# Supplementary material for: DFT study on the interaction between monomeric aluminium and chloride ion in aqueous solution
Source: Royal Society of Chemistry journal article supplement (doi:10.1039/c0dt01822h), 2011-01-01
Supplement: c0dt01822h.pdf [file c0dt01822h.pdf]

## Electronic Supplementary Information

### DFT study on the interaction between monomeric aluminum and chloride ion in aqueous solution

*Xiaoyan Jin,<sup>a</sup> Wenjing Yang,<sup>a</sup> Zhaosheng Qian,<sup>b</sup> Yingjie Wang<sup>a</sup> and Shuping Bi<sup>\*a</sup>*

<sup>a</sup>School of Chemistry and Chemical Engineering, State Key Laboratory of Coordination Chemistry  
of China & Key Laboratory of MOE for Life Science, Nanjing University,

Nanjing 210093, China

<sup>b</sup>College of Chemistry and Life Science, Zhejiang Normal University, Jinhua, Zhejiang 321004,  
China

#### Contents

|                                                                                            |    |
|--------------------------------------------------------------------------------------------|----|
| 1. Optimized geometries using GP, PCM and SM models for all aqueous Al-Cl complexes. ....  | 2  |
| 2. The change in the atomic natural charge. ....                                           | 11 |
| 3. The computational energies (a.u.) of all the clusters. ....                             | 11 |
| 4. The free energy (a. u.) of the related species for the pK <sub>a</sub> computation..... | 12 |
| 5. The computed pK <sub>a</sub> using GP, PCM and SM models. ....                          | 13 |
| 6. Cartesian coordinates of all the optimized geometries using SM-PCM model. ....          | 13 |

## 1. Optimized geometries using GP, PCM and SM models for all aqueous Al-Cl complexes.

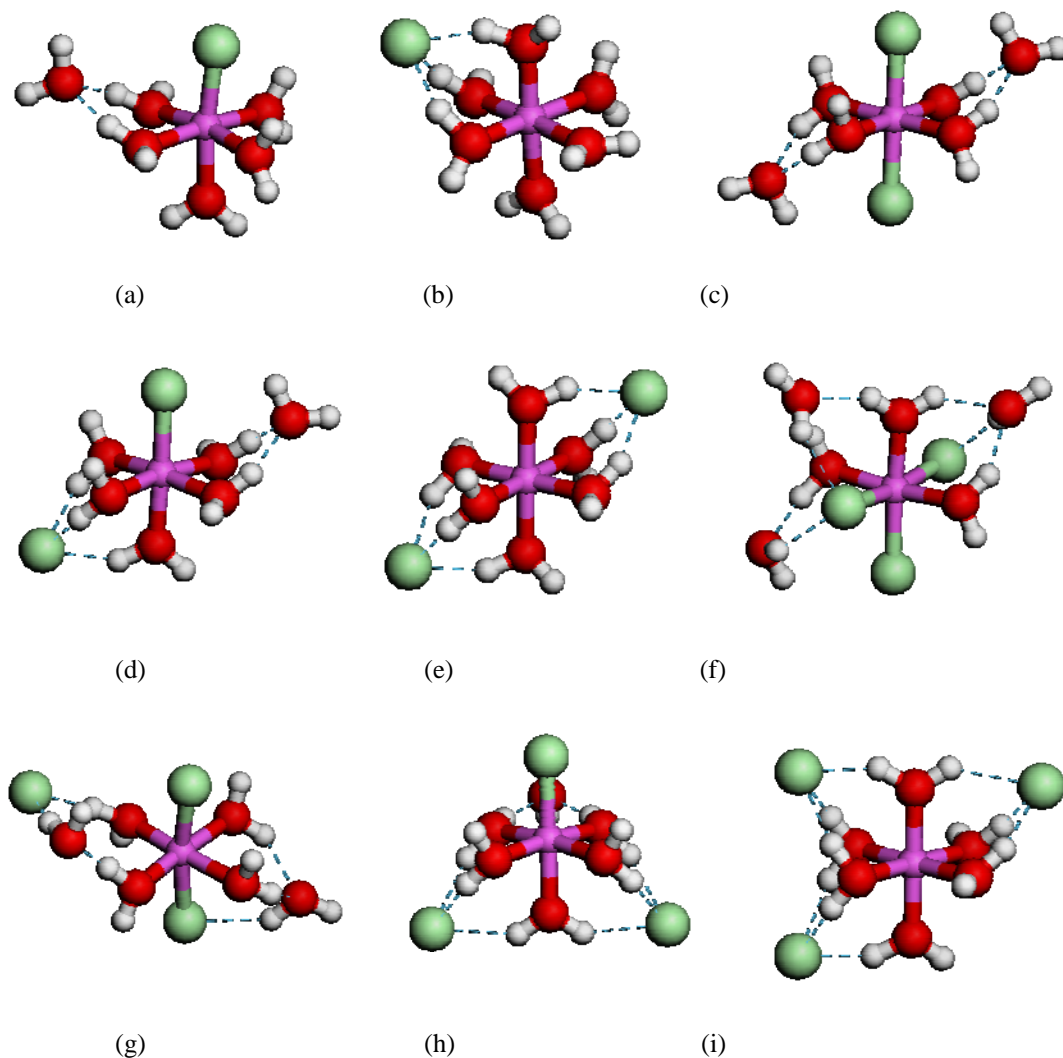

**Fig. S1** Optimized geometries of hexa-aqua-aluminum  $\text{Al}(\text{H}_2\text{O})_6^{3+}$  in the presence of chloride ions using GP model. (a) only one  $\text{Cl}^-$  locates in the inner-coordination shell; (b) only one  $\text{Cl}^-$  locates in the outer-coordination shell; (c) two  $\text{Cl}^-$  locate in the inner-coordination shell; (d) one  $\text{Cl}^-$  locates in the inner-coordination shell and one  $\text{Cl}^-$  locates in the outer-coordination shell; (e) two  $\text{Cl}^-$  locate in the outer-coordination shell; (f) three  $\text{Cl}^-$  locate in the inner-coordination shell; (g) two  $\text{Cl}^-$  locate in the inner-coordination shell and one  $\text{Cl}^-$  locates in the outer-coordination shell; (h) two  $\text{Cl}^-$  locate in the outer-coordination shell and one  $\text{Cl}^-$  locates in the inner-coordination shell; (i) three  $\text{Cl}^-$  locate in the outer-coordination shell.

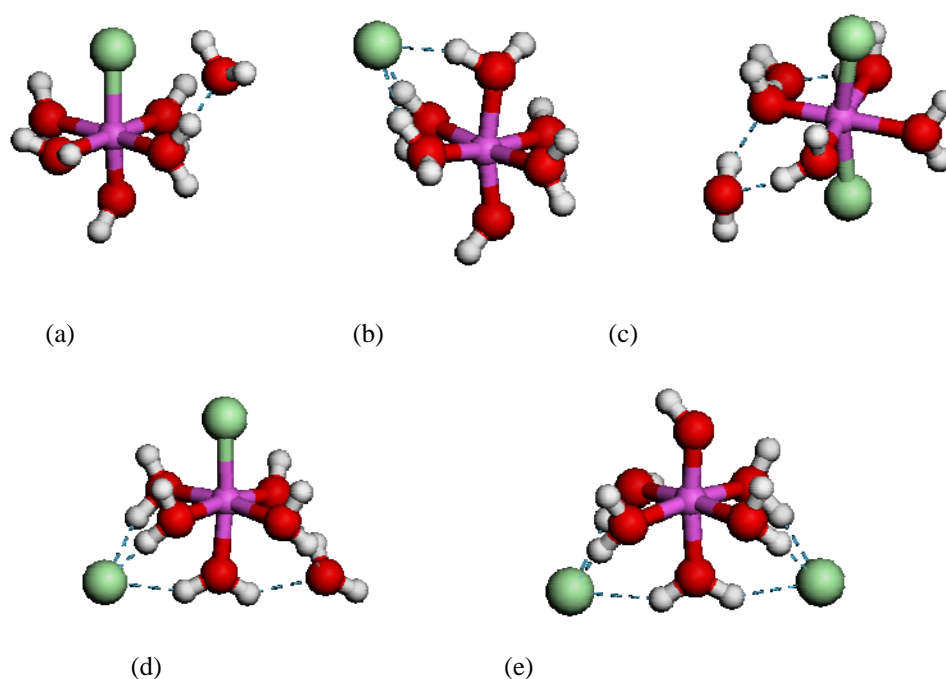

**Fig. S2** Optimized geometries of the first hydrolysis product  $\text{Al}(\text{H}_2\text{O})_4(\text{OH})_2^+$  in the presence of chloride ions using GP model. (a) Only one  $\text{Cl}^-$  locates in the inner-coordination shell; (b) only one  $\text{Cl}^-$  locates in the outer-coordination shell; (c) two  $\text{Cl}^-$  locate in the inner-coordination shell; (d) one  $\text{Cl}^-$  locates in the inner-coordination shell and one  $\text{Cl}^-$  locates in the outer-coordination shell; (e) two  $\text{Cl}^-$  locate in the outer-coordination shell.

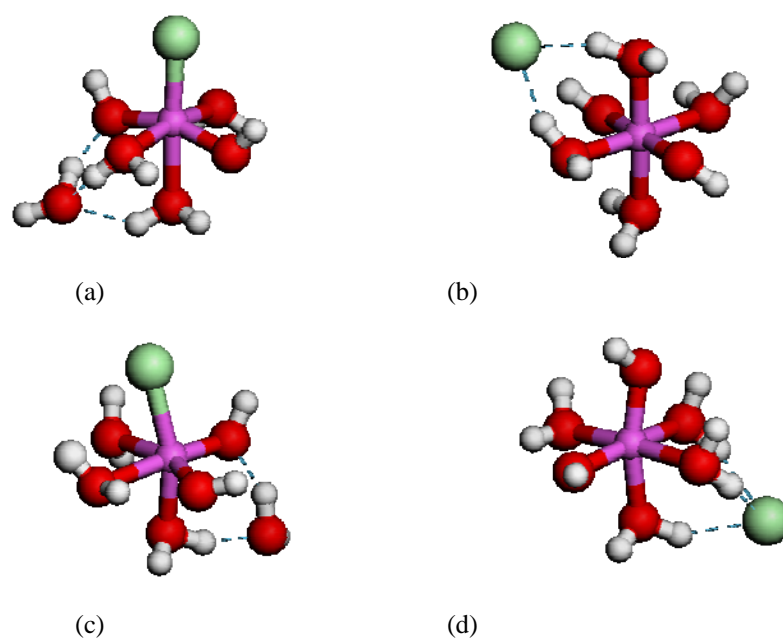

**Fig. S3** Optimized geometries of the second hydrolysis product  $\text{Al}(\text{H}_2\text{O})_4(\text{OH})_2^+$  in the presence of chloride ions using GP model. (a) One  $\text{Cl}^-$  locates in the inner-coordination shell of *trans* structure; (b) one  $\text{Cl}^-$  locates in the outer-coordination shell of *trans* structure; (c) one  $\text{Cl}^-$  locates in the inner-coordination shell of *cis* structure; (d) one  $\text{Cl}^-$  locates in the outer-coordination shell of *cis* structure.

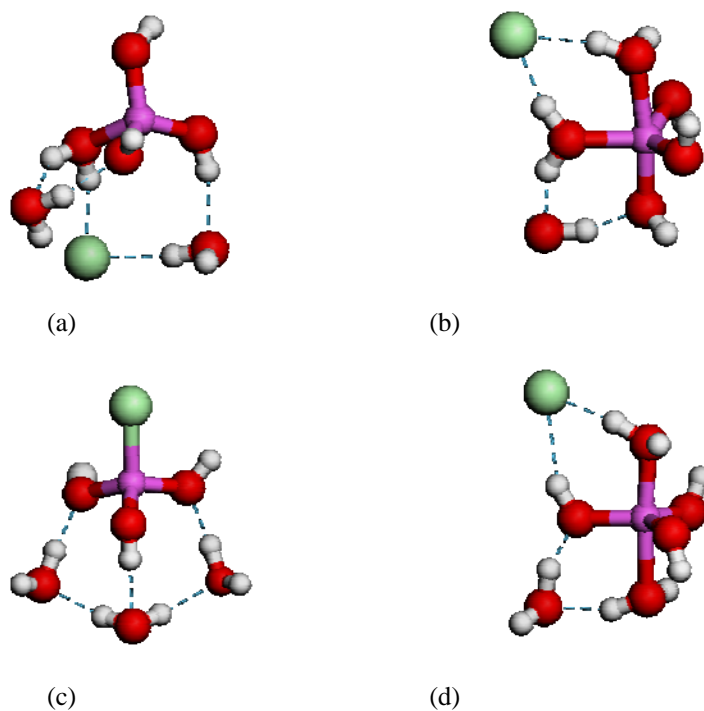

**Fig. S4** Optimized geometries of the third hydrolysis product  $\text{Al}(\text{H}_2\text{O})_2(\text{OH})_3^0$  in the presence of chloride ions using GP model. (a) One inner-sphere  $\text{Cl}^-$  in the structure with two equatorial and one axial  $\text{OH}^-$  moves to the outer sphere; (b) one  $\text{Cl}^-$  locates in the outer-coordination shell of the structure with two equatorial and one axial  $\text{OH}^-$ ; (c) one inner-sphere  $\text{Cl}^-$  in the structure with three equatorial  $\text{OH}^-$ ; (d) one  $\text{Cl}^-$  locates in the outer-coordination shell of the structure with three equatorial  $\text{OH}^-$ .

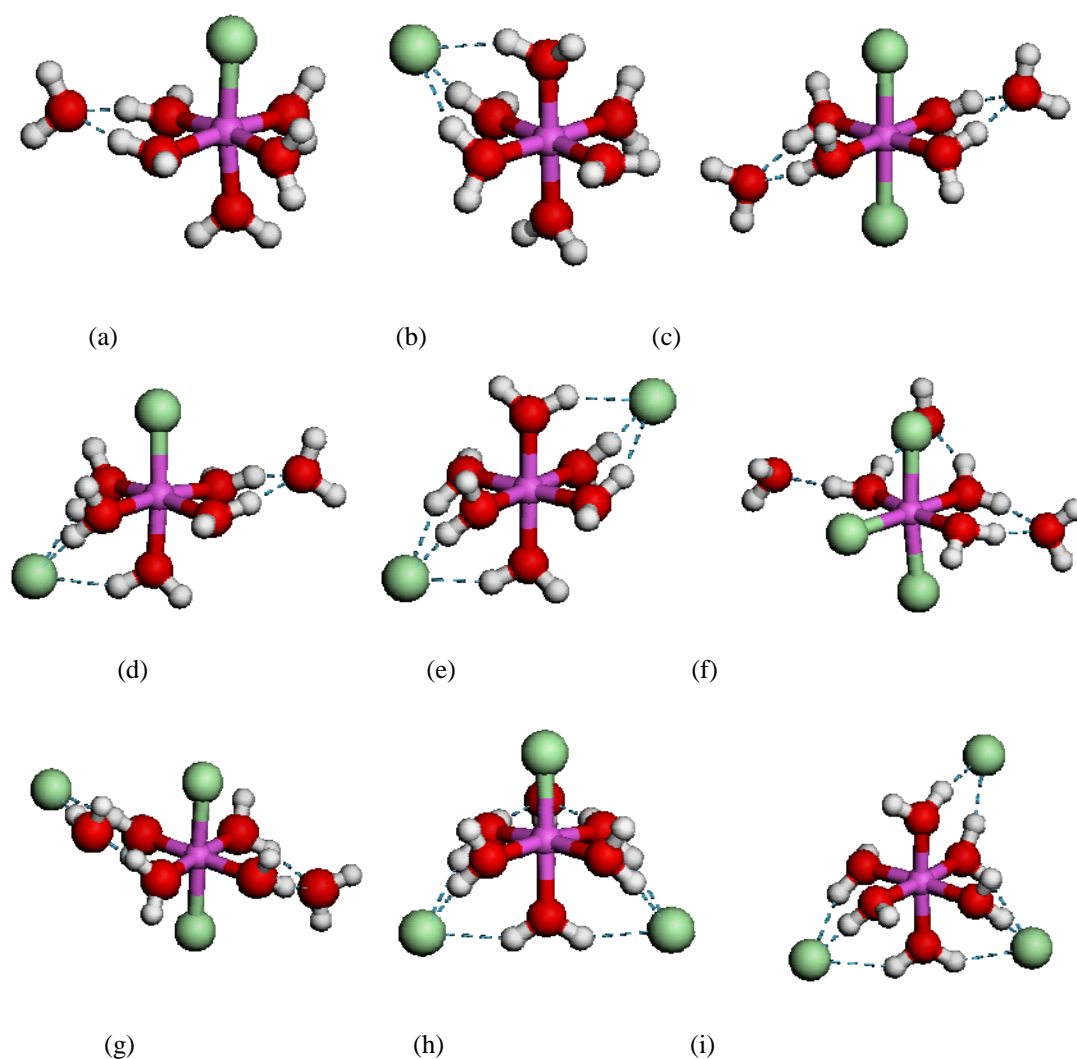

**Fig. S5** Optimized geometries of hexa-aqua-aluminum  $\text{Al}(\text{H}_2\text{O})_6^{3+}$  in the presence of chloride ions using PCM model. (a) only one  $\text{Cl}^-$  locates in the inner-coordination shell; (b) only one  $\text{Cl}^-$  locates in the outer-coordination shell; (c) two  $\text{Cl}^-$  locate in the inner-coordination shell; (d) one  $\text{Cl}^-$  locates in the inner-coordination shell and one  $\text{Cl}^-$  locates in the outer-coordination shell; (e) two  $\text{Cl}^-$  locate in the outer-coordination shell; (f) three  $\text{Cl}^-$  locate in the inner-coordination shell; (g) two  $\text{Cl}^-$  locate in the inner-coordination shell and one  $\text{Cl}^-$  locates in the outer-coordination shell; (h) two  $\text{Cl}^-$  locate in the outer-coordination shell and one  $\text{Cl}^-$  locates in the inner-coordination shell; (i) three  $\text{Cl}^-$  locate in the outer-coordination shell.

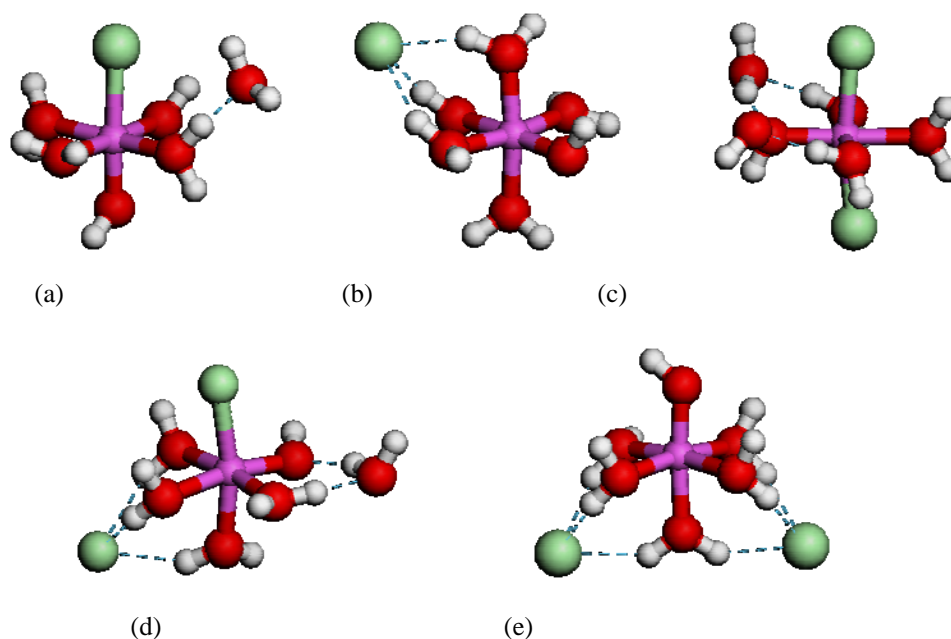

**Fig. S6** Optimized geometries of the first hydrolysis product  $\text{Al}(\text{H}_2\text{O})_4(\text{OH})_2^+$  in the presence of chloride ions using PCM model. (a) Only one  $\text{Cl}^-$  locates in the inner-coordination shell; (b) only one  $\text{Cl}^-$  locates in the outer-coordination shell; (c) two  $\text{Cl}^-$  locate in the inner-coordination shell; (d) one  $\text{Cl}^-$  locates in the inner-coordination shell and one  $\text{Cl}^-$  locates in the outer-coordination shell; (e) two  $\text{Cl}^-$  locate in the outer-coordination shell.

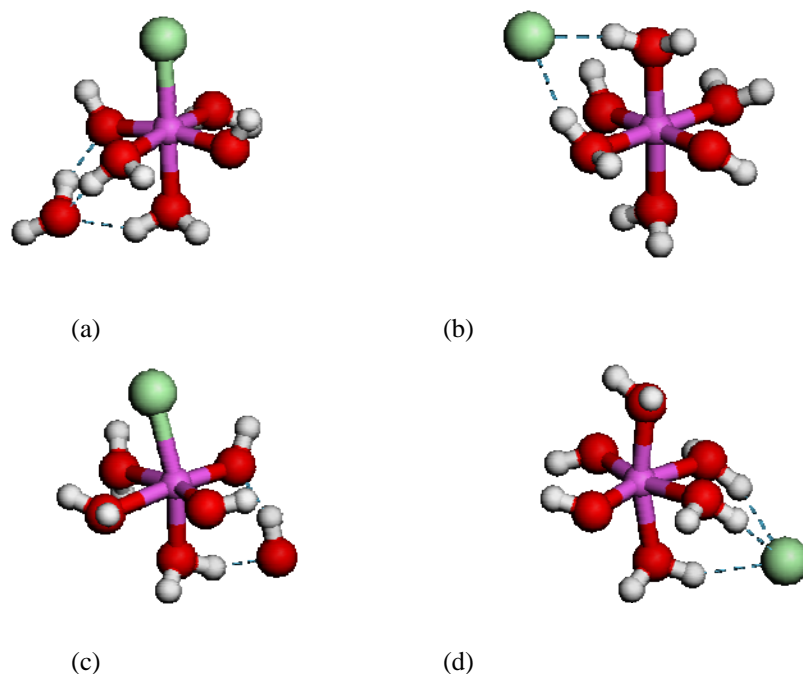

**Fig. S7** Optimized geometries of the second hydrolysis product  $\text{Al}(\text{H}_2\text{O})_4(\text{OH})_2^+$  in the presence of chloride ions using PCM model. (a) One  $\text{Cl}^-$  locates in the inner-coordination shell of *trans* structure; (b) one  $\text{Cl}^-$  locates in the outer-coordination shell of *trans* structure; (c) one  $\text{Cl}^-$  locates in the inner-coordination shell of *cis* structure; (d) one  $\text{Cl}^-$  locates in the outer-coordination shell of *cis* structure.

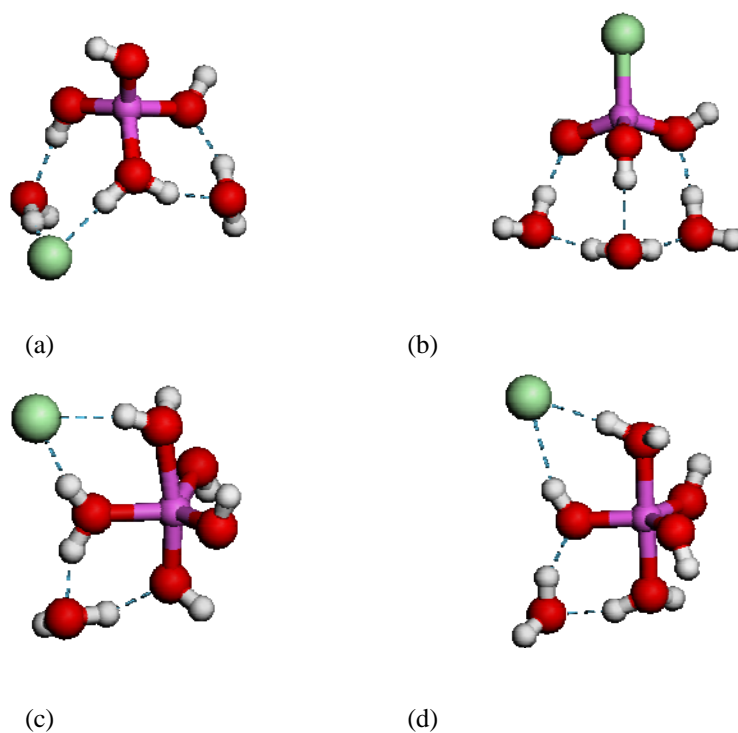

**Fig. S8** Optimized geometries of the third hydrolysis product  $\text{Al}(\text{H}_2\text{O})_2(\text{OH})_3^0$  in the presence of chloride ions using PCM model. (a) One inner-sphere  $\text{Cl}^-$  in the structure with two equatorial and one axial  $\text{OH}^-$  moves to the outer sphere; (b) one inner-sphere  $\text{Cl}^-$  in the structure with three equatorial  $\text{OH}^-$  (c) one  $\text{Cl}^-$  locates in the outer-coordination shell of the structure with two equatorial and one axial  $\text{OH}^-$ ; (d) one  $\text{Cl}^-$  locates in the outer-coordination shell of the structure with three equatorial  $\text{OH}^-$ .

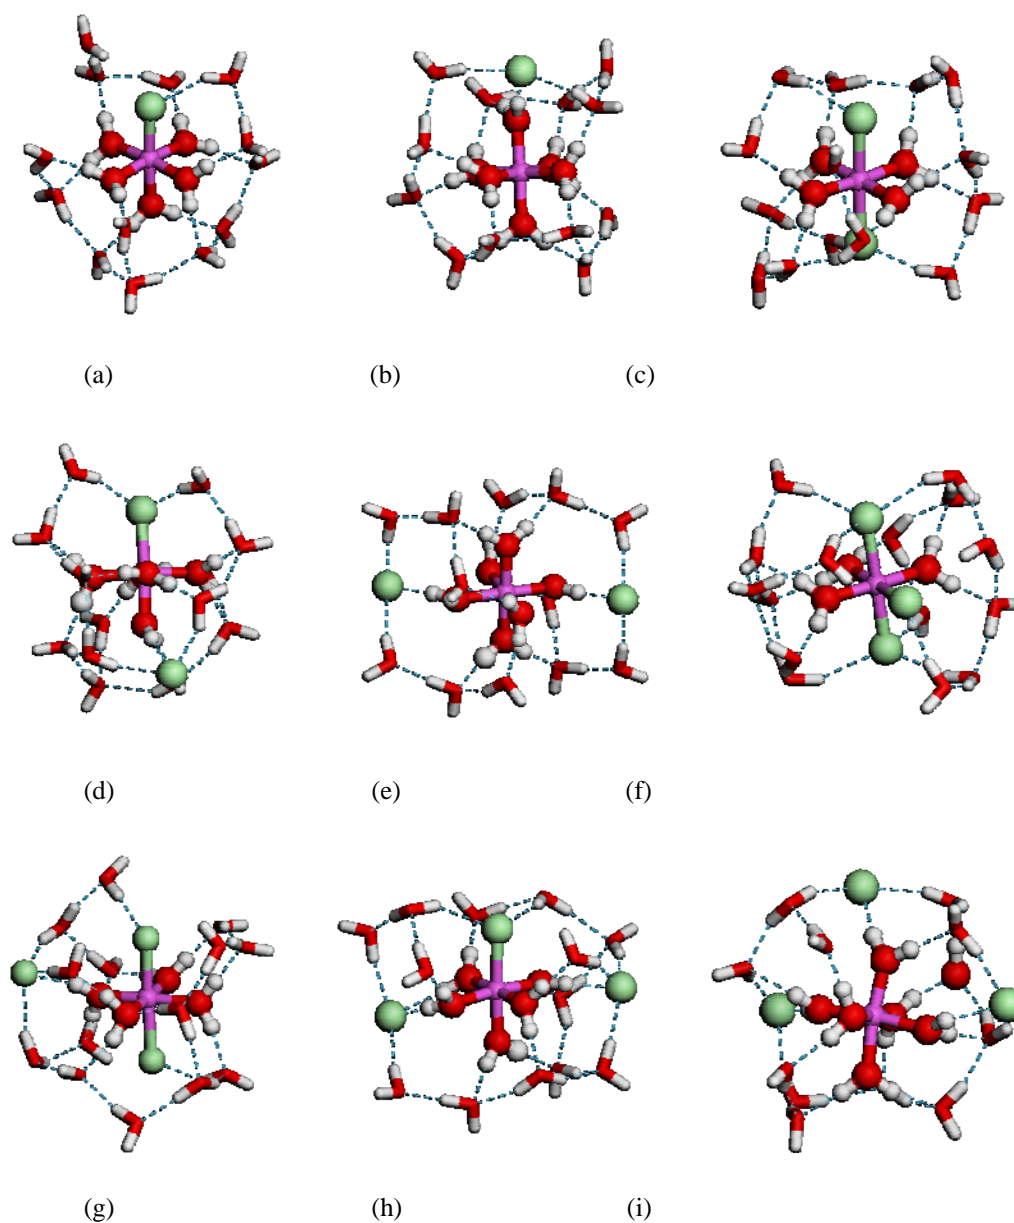

**Fig. S10** Optimized geometries of hexa-aqua-aluminum  $\text{Al}(\text{H}_2\text{O})_6^{3+}$  in the presence of chloride ions using SM model. (a) only one  $\text{Cl}^-$  locates in the inner-coordination shell; (b) only one  $\text{Cl}^-$  locates in the outer-coordination shell; (c) two  $\text{Cl}^-$  locate in the inner-coordination shell; (d) one  $\text{Cl}^-$  locates in the inner-coordination shell and one  $\text{Cl}^-$  locates in the outer-coordination shell; (e) two  $\text{Cl}^-$  locate in the outer-coordination shell; (f) three  $\text{Cl}^-$  locate in the inner-coordination shell; (g) two  $\text{Cl}^-$  locate in the inner-coordination shell and one  $\text{Cl}^-$  locates in the outer-coordination shell; (h) two  $\text{Cl}^-$  locate in the outer-coordination shell and one  $\text{Cl}^-$  locates in the inner-coordination shell; (i) three  $\text{Cl}^-$  locate in the outer-coordination shell.



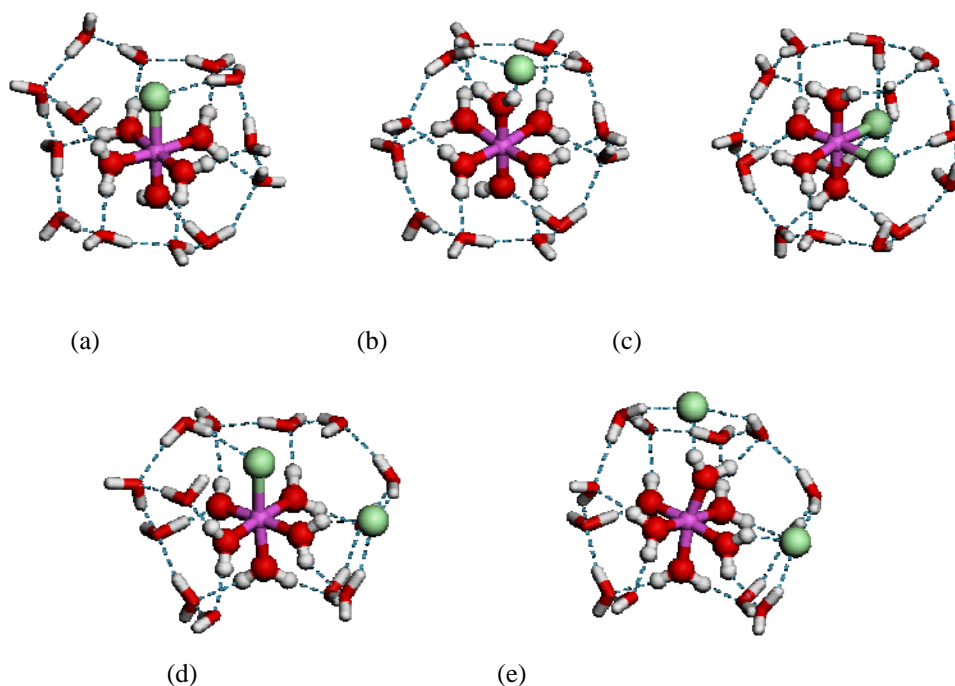

**Fig. S11** Optimized geometries of the first hydrolysis product  $\text{Al}(\text{H}_2\text{O})_4(\text{OH})_2^+$  in the presence of chloride ions using SM model. (a) Only one  $\text{Cl}^-$  locates in the inner-coordination shell; (b) only one  $\text{Cl}^-$  locates in the outer-coordination shell; (c) two  $\text{Cl}^-$  locate in the inner-coordination shell; (d) one  $\text{Cl}^-$  locates in the inner-coordination shell and one  $\text{Cl}^-$  locates in the outer-coordination shell; (e) two  $\text{Cl}^-$  locate in the outer-coordination shell.

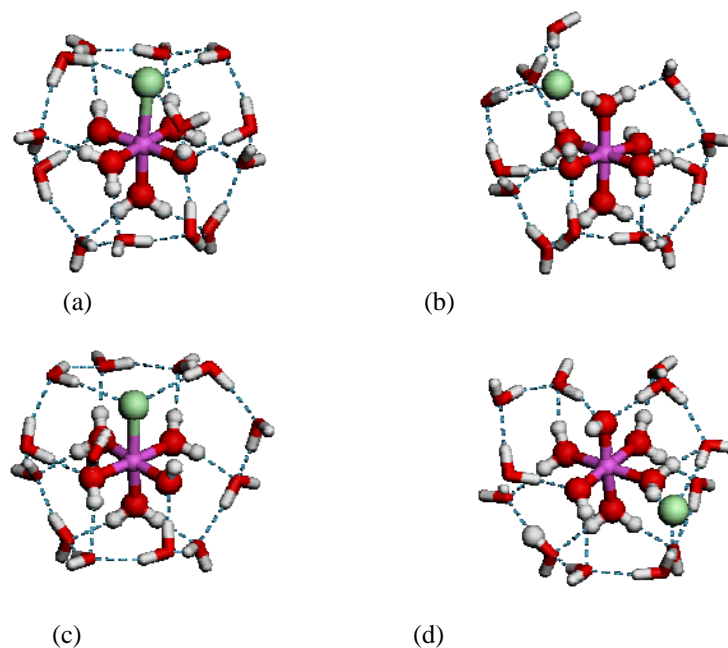

**Fig. S12** Optimized geometries of the second hydrolysis product  $\text{Al}(\text{H}_2\text{O})_4(\text{OH})_2^+$  in the presence of chloride ions using SM model. (a) One  $\text{Cl}^-$  locates in the inner-coordination shell of *trans* structure; (b) one  $\text{Cl}^-$  locates in the outer-coordination shell of *trans* structure; (c) one  $\text{Cl}^-$  locates in the inner-coordination shell of *cis* structure; (d) one  $\text{Cl}^-$  locates in the outer-coordination shell of *cis* structure.

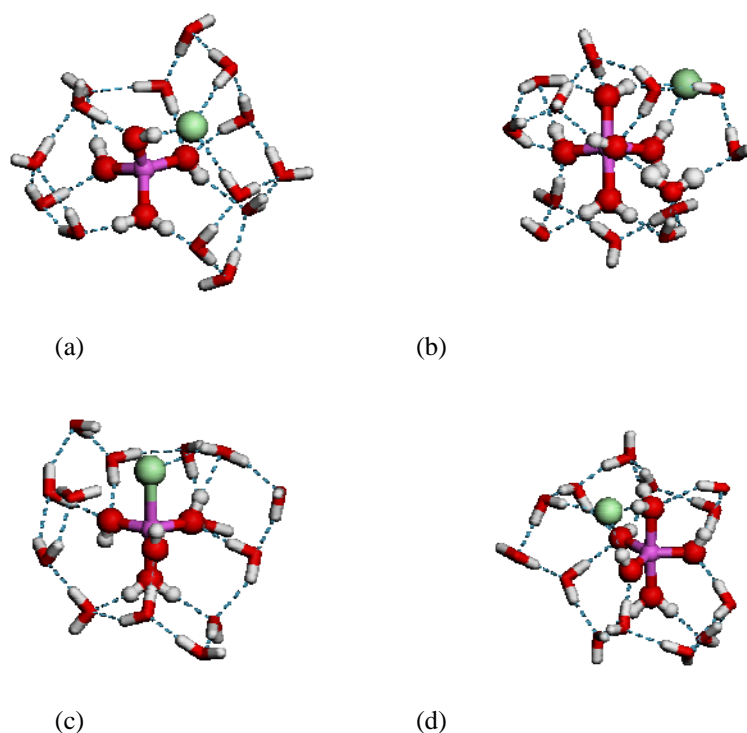

**Fig. S13** Optimized geometries of the third hydrolysis product  $\text{Al}(\text{H}_2\text{O})_2(\text{OH})_3^0$  in the presence of chloride ions using SM model. (a) One inner-sphere  $\text{Cl}^-$  in the structure with two equatorial and one axial  $\text{OH}^-$  moves to the outer sphere; (b) one  $\text{Cl}^-$  locates in the outer-coordination shell of the structure with two equatorial and one axial  $\text{OH}^-$ ; (c) one inner-sphere  $\text{Cl}^-$  in the structure with three equatorial  $\text{OH}^-$  move to the outer-coordination shell; (d) one  $\text{Cl}^-$  locates in the outer-coordination shell of the structure with three equatorial  $\text{OH}^-$ .

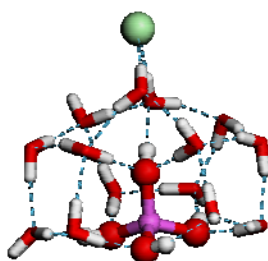

**Fig. S14** Optimized geometry of  $\text{Al}(\text{OH})_4^-$  in the presence of chloride ion using SM-PCM model.

## 2. The change in the atomic natural charge.

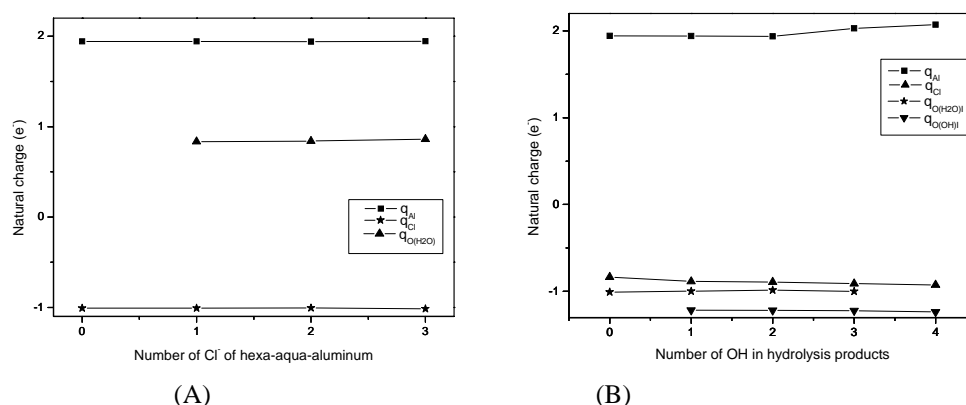

**Fig. S15** (A). Natural charge of hexa-aqua-aluminum as a function of the number of chloride ions. (B). Natural charge of various hydrolysis products in the presence one chloride ion. Note: all atomic charge is average.

## 3. The computational energies (a.u.) of all the clusters.

**Table S1** The absolute energies (a. u.) of various aqueous aluminum clusters in the presence of chloride ions

| Cluster <sup>a</sup>                                                                                  | I/O <sup>b</sup> | E(GP) <sup>c</sup> | E(PCM) <sup>d</sup> | E(SM) <sup>e</sup> | E(SM-PCM) <sup>f</sup> |
|-------------------------------------------------------------------------------------------------------|------------------|--------------------|---------------------|--------------------|------------------------|
| [Al(H <sub>2</sub> O) <sub>5</sub> Cl](H <sub>2</sub> O) <sup>2+</sup>                                | I                | -1160.935016       | -1161.275368        | -2078.484213       | -2078.742702           |
| [Al(H <sub>2</sub> O) <sub>6</sub> ]Cl <sup>2+</sup>                                                  | O                | -1160.902032       | -1161.269686        | -2078.478142       | -2078.748240           |
| [Al(H <sub>2</sub> O) <sub>4</sub> Cl <sub>2</sub> ](H <sub>2</sub> O) <sub>2</sub> <sup>+</sup>      | 2I               | -1621.582706       | -1621.699508        | -2539.023078       | -2539.143127           |
| [Al(H <sub>2</sub> O) <sub>5</sub> Cl](H <sub>2</sub> O)Cl <sup>+</sup>                               | 1I+1O            | -1621.569788       | -1621.701147        | -2539.033886       | -2539.164064           |
| [Al(H <sub>2</sub> O) <sub>6</sub> ]Cl <sub>2</sub> <sup>+</sup>                                      | 2O               | -1621.555496       | -1621.697824        | -2539.036018       | -2539.173032           |
| [Al(H <sub>2</sub> O) <sub>3</sub> Cl <sub>3</sub> ](H <sub>2</sub> O) <sub>3</sub> <sup>0</sup>      | 3I               | -2082.058182       | -2082.114860        | -2999.479681       | -2999.545506           |
| [Al(H <sub>2</sub> O) <sub>4</sub> Cl <sub>2</sub> ](H <sub>2</sub> O) <sub>2</sub> Cl <sup>0</sup>   | 2I+1O            | -2082.063171       | -2082.125791        | -2999.484412       | -2999.565378           |
| [Al(H <sub>2</sub> O) <sub>5</sub> Cl](H <sub>2</sub> O) <sub>2</sub> Cl <sup>0</sup>                 | 1I+2O            | -2082.073276       | -2082.123889        | -2999.505074       | -2999.581245           |
| [Al(H <sub>2</sub> O) <sub>6</sub> ]Cl <sub>3</sub> <sup>0</sup>                                      | 3O               | -2082.066054       | -2082.124457        | -2999.486781       | -2999.587848           |
| [Al(OH)(H <sub>2</sub> O) <sub>4</sub> Cl](H <sub>2</sub> O) <sup>+</sup>                             | I                | -1160.727199       | -1160.850743        | -2078.183168       | -2078.302372           |
| [Al(OH)(H <sub>2</sub> O) <sub>5</sub> ]Cl <sup>+</sup>                                               | O                | -1160.710956       | -1160.848981        | -2078.174413       | -2078.310757           |
| [Al(OH)(H <sub>2</sub> O) <sub>3</sub> Cl <sub>2</sub> ](H <sub>2</sub> O) <sub>2</sub> <sup>0</sup>  | 2I               | -1621.218249       | -1621.264796        | -2538.609011       | -2538.708454           |
| [Al(OH)(H <sub>2</sub> O) <sub>4</sub> Cl](H <sub>2</sub> O)Cl <sup>0</sup>                           | 1I+1O            | -1621.222749       | -1621.271992        | -2538.637594       | -2538.717361           |
| [Al(OH)(H <sub>2</sub> O) <sub>5</sub> ]Cl <sub>2</sub> <sup>0</sup>                                  | 2O               | -1621.220072       | -1621.271722        | -2538.633789       | -2538.726076           |
| <i>cis</i> -[Al(OH) <sub>2</sub> (H <sub>2</sub> O) <sub>3</sub> Cl](H <sub>2</sub> O) <sup>0</sup>   | I                | -1160.359414       | -1160.409093        | -2077.768717       | -2077.846037           |
| <i>cis</i> -[Al(OH) <sub>2</sub> (H <sub>2</sub> O) <sub>4</sub> ]Cl <sup>0</sup>                     | O                | -1160.362266       | -1160.412322        | -2077.785583       | -2077.863235           |
| <i>trans</i> -[Al(OH) <sub>2</sub> (H <sub>2</sub> O) <sub>3</sub> Cl](H <sub>2</sub> O) <sup>0</sup> | I                | -1160.360776       | -1160.408860        | -2077.777301       | -2077.845671           |
| <i>trans</i> -[Al(OH) <sub>2</sub> (H <sub>2</sub> O) <sub>4</sub> ]Cl <sup>0</sup>                   | O                | -1160.355496       | -1160.415154        | -2077.790928       | -2077.861319           |
| <i>trans</i> -[Al(OH) <sub>3</sub> (H <sub>2</sub> O)Cl](H <sub>2</sub> O) <sub>2</sub> <sup>-</sup>  | I                | -1159.884264       | -1159.985224        | -2077.285021       | -2077.418191           |
| <i>trans</i> -[Al(OH) <sub>3</sub> (H <sub>2</sub> O) <sub>2</sub> ](H <sub>2</sub> O)Cl <sup>-</sup> | O                | -1159.876246       | -1159.984030        | -2077.295468       | -2077.421097           |
| <i>cis</i> -[Al(OH) <sub>3</sub> (H <sub>2</sub> O)Cl](H <sub>2</sub> O) <sub>2</sub> <sup>-</sup>    | I                | -1159.879216       | -1159.983615        | -2077.298551       | -2077.420969           |
| <i>cis</i> -[Al(OH) <sub>3</sub> (H <sub>2</sub> O) <sub>2</sub> ](H <sub>2</sub> O)Cl <sup>-</sup>   | O                | -1159.878368       | -1159.980210        | -2077.294241       | -2077.412070           |

<sup>a</sup> Twelve water molecules in the second solvation sphere for SM and SM-PCM models were omitted for simplicity.

<sup>b</sup> I/O denotes Cl<sup>-</sup> in inter-coordination shell or in outer-coordination shell.

<sup>c</sup> The energy for gas phase cluster only involving first solvation sphere.

<sup>d</sup> The energy using PCM method only involving first solvation sphere.

<sup>e</sup> The energy for gas phase cluster in supermolecular model.

<sup>f</sup> The energy using PCM method in supermolecular model.

<sup>g</sup> tetra=tetracoordinate.

#### 4. The free energy (a. u.) of the related species for the pK<sub>a</sub> computation.

**Table S2** The free energy (a. u.) of the related species for the pK<sub>a</sub> computation.

|                               | GP                   |                         | PCM                  |                         | SM                   |                         | SM-PCM               |                         |
|-------------------------------|----------------------|-------------------------|----------------------|-------------------------|----------------------|-------------------------|----------------------|-------------------------|
|                               | With Cl <sup>-</sup> | Without Cl <sup>-</sup> |
| Hexa-aqua-aluminum            | -1160.939903         | -700.155711             | -1161.309394         | -700.900582             | -2078.552792         | -1617.891459            | -2078.822577         | -1618.394544            |
| The first hydrolysis product  | -1160.749267         | -700.107726             | -1160.888762         | -700.461618             | -2078.246403         | -1617.701128            | -2078.382676         | -1617.959907            |
| The second hydrolysis product | -1160.394666         | -699.908885             | -1160.455531         | -700.034998             | -2077.863676         | -1617.403406            | -2077.936570         | -1617.517758            |
| The third hydrolysis product  | -1159.927763         | -699.531151             | -1160.027546         | -699.581986             | -2077.372126         | -1617.008087            | -2077.493792         | -1617.077978            |
| The forth hydrolysis product  | -                    | -699.062024             | -                    | -699.165789             | -2076.806914         | -1616.528135            | -2077.053240         | -1616.635099            |
| H <sub>2</sub> O              | -76.454816           |                         | -76.467652           |                         | -                    |                         | -                    |                         |
| H <sub>3</sub> O <sup>+</sup> | -76.714912           |                         | -76.895985           |                         | -                    |                         | -                    |                         |

## 5. The computed pK<sub>a</sub> using GP, PCM and SM models.

**Table S3** The computed pK<sub>a</sub> using GP, PCM and SM models.

|                  | GP                   |                         | PCM                  |                         | SM                   |                         |
|------------------|----------------------|-------------------------|----------------------|-------------------------|----------------------|-------------------------|
|                  | With Cl <sup>-</sup> | Without Cl <sup>-</sup> | With Cl <sup>-</sup> | Without Cl <sup>-</sup> | With Cl <sup>-</sup> | Without Cl <sup>-</sup> |
| pK <sub>a1</sub> | -33.7                | -99.3                   | -5.3                 | 3.1                     | 19.5                 | -33.8                   |
| pK <sub>a2</sub> | 8.0                  | -129.2                  | -4.8                 | 0.6                     | 74.2                 | 18.2                    |
| pK <sub>a3</sub> | 101.4                | -76.8                   | -6.7                 | 10.2                    | 178.9                | 78.6                    |
| pK <sub>a4</sub> | -                    | 17.6                    | -                    | 2.9                     | 317.5                | 178.0                   |

## 6. Cartesian coordinates of all the optimized geometries using SM-PCM model.

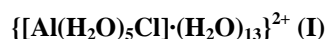

|    |             |             |             |
|----|-------------|-------------|-------------|
| Al | 0.16033400  | -0.08641600 | 0.03287100  |
| O  | 0.99794500  | 1.10253300  | 1.27828900  |
| O  | 0.89861100  | -1.58999300 | 0.96401500  |
| O  | -1.34325500 | -0.14363100 | 1.27648200  |
| O  | -0.77098000 | -1.29999400 | -1.09005000 |
| O  | -0.73664000 | 1.39017500  | -0.82419400 |
| O  | 3.27147300  | 0.49534900  | 2.42234300  |
| O  | 0.14501900  | 3.64690600  | 1.49106400  |
| O  | -0.88264500 | -3.60481900 | 1.32351100  |
| O  | 3.48681300  | -2.05834000 | 1.32953700  |
| O  | -2.17859100 | 2.27462700  | 2.22149400  |
| O  | -3.23521000 | -2.01957000 | 1.26718400  |
| O  | -4.55798700 | -0.59344700 | -0.70045400 |
| O  | -0.06275100 | -3.82587300 | -1.34974500 |
| O  | 0.36412300  | 3.78216600  | -1.24540100 |
| O  | -3.35367700 | 1.89457000  | -0.24775300 |
| O  | 4.47342500  | -2.02831400 | -1.16711400 |
| O  | 2.90649000  | 3.17421000  | -1.83745600 |
| H  | 1.86021000  | 0.88993900  | 1.74685600  |
| H  | 0.78121000  | 2.06178400  | 1.37586200  |
| H  | 0.31936400  | -2.35499100 | 1.20417400  |
| H  | 1.85903100  | -1.83589000 | 1.05059300  |
| H  | -1.61239000 | 0.65012700  | 1.79296400  |
| H  | -2.05445600 | -0.83361100 | 1.31678100  |
| H  | -1.45963600 | -1.06095100 | -1.77652600 |
| H  | -0.46333400 | -2.23549300 | -1.25817800 |
| H  | -0.30602100 | 2.23976100  | -1.10971700 |
| H  | -1.70447200 | 1.55656600  | -0.70073700 |
| H  | 3.51185000  | -0.41608800 | 2.15798200  |
| H  | 3.31439700  | 0.51905200  | 3.39322100  |
| H  | -1.78921900 | -3.23900200 | 1.30502500  |
| H  | -0.84715000 | -4.21319500 | 2.08286400  |
| H  | -1.44913900 | 2.92011300  | 2.11422800  |
| H  | -2.57941000 | 2.44129300  | 3.09309200  |
| H  | 0.21232900  | 3.98781900  | 0.57303500  |
| H  | 0.59642600  | 4.29023800  | 2.06698900  |
| H  | 3.97242800  | -2.09413800 | 0.46639100  |
| H  | 3.74999800  | -2.84453900 | 1.83971900  |
| H  | -3.82541000 | -1.68249700 | 0.55579100  |
| H  | -3.79211900 | -2.10837000 | 2.06212500  |

|    |             |             |             |
|----|-------------|-------------|-------------|
| H  | -4.32573900 | 0.33326500  | -0.47946000 |
| H  | -5.52685400 | -0.62347300 | -0.79015000 |
| H  | 1.30296100  | 3.69420400  | -1.55174500 |
| H  | -0.07856100 | 4.40680300  | -1.84705400 |
| H  | 5.34531200  | -1.64877600 | -1.37066800 |
| H  | 3.82337700  | -1.40670200 | -1.53395100 |
| H  | -0.38291700 | -4.19143800 | -0.50647300 |
| H  | -0.44930200 | -4.37237700 | -2.05476100 |
| H  | -3.21345200 | 2.19321100  | 0.67531900  |
| H  | -3.77130100 | 2.63950200  | -0.71873600 |
| H  | 3.32037500  | 3.38261600  | -2.69217500 |
| H  | 2.86376000  | 2.20378800  | -1.79126000 |
| Cl | 1.96462500  | 0.07212800  | -1.42223200 |
| H  | -2.84900700 | -1.33424300 | -3.52520400 |
| O  | -2.71141300 | -0.74878900 | -2.76169800 |
| H  | -3.52211000 | -0.79921200 | -2.21601700 |

**{[Al(H<sub>2</sub>O)<sub>6</sub>](H<sub>2</sub>O)<sub>12</sub>Cl]<sup>2+</sup>(O)**

|    |             |             |             |
|----|-------------|-------------|-------------|
| Al | -0.33228600 | -0.25467400 | -0.41758200 |
| O  | -0.97718200 | 1.28812200  | 0.52668200  |
| O  | 1.46398600  | 0.35265700  | -0.23093500 |
| O  | -0.20230200 | -1.24273000 | 1.21724300  |
| O  | 0.25515800  | -1.77657300 | -1.40262900 |
| O  | -2.14741200 | -0.80541300 | -0.61619600 |
| O  | -0.43901800 | 0.72026000  | -2.09186200 |
| O  | -0.40330400 | 3.82846000  | 0.08334500  |
| O  | -3.30668800 | 1.09461800  | 1.84606400  |
| O  | 3.94934200  | -2.57043400 | 0.20075600  |
| O  | 2.24860900  | 4.04498300  | 0.32604300  |
| O  | -2.45327400 | -1.45809700 | 2.66272800  |
| O  | 2.23795500  | -1.58667900 | 2.26981000  |
| O  | -0.88352600 | -4.09437100 | -0.91115500 |
| O  | 2.77746000  | -2.08706200 | -2.16104300 |
| O  | -3.87123600 | 1.20300000  | -0.93883700 |
| O  | -3.10288200 | -3.02449500 | 0.46535800  |
| O  | 2.28099200  | 0.55546100  | -2.73386900 |
| O  | -1.90566200 | 2.93090500  | -2.06285400 |
| H  | -0.69067800 | 2.23793900  | 0.42040000  |
| H  | -1.77644700 | 1.26161500  | 1.11047100  |
| H  | 1.89770700  | 0.75461200  | 0.57765000  |
| H  | 1.97131000  | 0.58511800  | -1.04700900 |
| H  | -0.94466400 | -1.32195700 | 1.86830700  |
| H  | 0.67179700  | -1.43380700 | 1.65231400  |
| H  | -0.18671500 | -2.66422400 | -1.25914200 |
| H  | 1.19822900  | -1.93759300 | -1.68052800 |
| H  | -2.85563900 | -0.14220200 | -0.83036200 |
| H  | -2.56065200 | -1.65395900 | -0.30130200 |
| H  | 0.35636700  | 0.73736700  | -2.66069400 |
| H  | -0.94622000 | 1.57071800  | -2.19433500 |
| H  | 0.57318200  | 4.00540000  | 0.14901800  |
| H  | -0.83147800 | 4.44236300  | 0.70774600  |
| H  | 3.41026200  | -2.24935900 | 0.94956400  |
| H  | 4.86033600  | -2.28704900 | 0.38427800  |

|    |             |             |             |
|----|-------------|-------------|-------------|
| H  | -2.92460700 | -0.60540600 | 2.57025200  |
| H  | -2.45345100 | -1.67928900 | 3.61206200  |
| H  | -3.88889800 | 1.22436500  | 1.07362600  |
| H  | -3.57810600 | 1.75368300  | 2.51226600  |
| H  | 2.54728000  | 3.35865900  | 0.95466900  |
| H  | 2.67643200  | 4.87169500  | 0.60589600  |
| H  | 2.30458600  | -2.08063700 | 3.10839200  |
| H  | 2.53743500  | -0.67010900 | 2.46313300  |
| H  | -1.70545200 | -3.96934800 | -0.40071200 |
| H  | -1.11910600 | -4.66112600 | -1.66626600 |
| H  | -3.38583100 | 1.93647400  | -1.36783900 |
| H  | -4.71332500 | 1.10901300  | -1.42048800 |
| H  | 2.68998300  | -0.32846300 | -2.83081000 |
| H  | 2.84497300  | 1.19519000  | -3.20406900 |
| H  | 3.30300700  | -2.27305700 | -1.33924200 |
| H  | 2.96294800  | -2.81060600 | -2.78580400 |
| H  | -3.07217600 | -2.74808900 | 1.40308400  |
| H  | -4.00394400 | -3.35525500 | 0.29409000  |
| H  | -1.42673300 | 3.52449200  | -1.44720900 |
| H  | -2.08224900 | 3.44280500  | -2.87391200 |
| Cl | 2.85234400  | 1.48175900  | 2.16069900  |

**{[Al(H<sub>2</sub>O)<sub>4</sub>Cl<sub>2</sub>](H<sub>2</sub>O)<sub>14</sub>}<sup>+</sup> (2I)**

|    |             |             |             |
|----|-------------|-------------|-------------|
| Al | 0.04624600  | -0.07844200 | -0.01173400 |
| O  | 0.80366900  | -1.30735800 | 1.25133600  |
| O  | -1.27424000 | 0.52346900  | 1.22613900  |
| O  | -0.68262000 | 1.13384000  | -1.29381600 |
| O  | 1.40280500  | -0.58094200 | -1.27740100 |
| O  | -0.53209400 | -1.63124300 | 3.49346100  |
| O  | 3.50693600  | -1.65053300 | 1.10911200  |
| O  | -2.06916600 | 3.04851300  | 1.10068300  |
| O  | -3.25691800 | -0.83434500 | 2.33990100  |
| O  | 4.81227400  | 0.66749900  | -0.00725200 |
| O  | 0.10598300  | 4.37050200  | -0.02264700 |
| O  | 0.95121600  | 2.90449300  | -2.45658500 |
| O  | -3.27530100 | 0.91421700  | -1.93879600 |
| O  | 2.61132100  | -2.98165900 | -1.12754600 |
| O  | 3.19768900  | 1.19598800  | -2.12552800 |
| O  | -4.76174400 | -0.52647500 | 0.09592900  |
| O  | 0.44350200  | -4.51888400 | -0.72636600 |
| H  | 0.32275100  | -1.51676200 | 2.10578400  |
| H  | 1.78288400  | -1.36307200 | 1.36603800  |
| H  | -1.55215800 | 1.48508900  | 1.20343100  |
| H  | -2.00256600 | -0.01149700 | 1.64117700  |
| H  | -0.15669700 | 1.80517800  | -1.79945400 |
| H  | -1.64490200 | 1.13257900  | -1.54338100 |
| H  | 1.80824400  | -1.48521800 | -1.29943100 |
| H  | 2.06616100  | 0.07157800  | -1.63085700 |
| H  | -1.48176800 | -1.61882800 | 3.29993900  |
| H  | -0.31135500 | -0.74417500 | 3.85400900  |
| H  | -1.38356900 | 3.61573400  | 0.68297900  |
| H  | -2.30976600 | 3.48709700  | 1.93331600  |
| H  | 4.39843900  | -0.10179200 | 0.43152400  |
| H  | 4.79924100  | 1.37613600  | 0.65646200  |

|                                                                                                 |             |             |             |
|-------------------------------------------------------------------------------------------------|-------------|-------------|-------------|
| H                                                                                               | 3.42065700  | -2.30683100 | 0.38568700  |
| H                                                                                               | 3.99774100  | -2.09086900 | 1.82552800  |
| H                                                                                               | -3.88211300 | -0.78493200 | 1.57422700  |
| H                                                                                               | -3.70872600 | -0.38932700 | 3.07801700  |
| H                                                                                               | 0.23166100  | 4.24815200  | -0.97709800 |
| H                                                                                               | 0.69050900  | 3.68781400  | 0.35297400  |
| H                                                                                               | 1.83428900  | 2.49527900  | -2.35311400 |
| H                                                                                               | 0.86479100  | 3.12783900  | -3.39993300 |
| H                                                                                               | 1.90307100  | -3.65670600 | -0.96981100 |
| H                                                                                               | 3.14613100  | -3.30061700 | -1.87555700 |
| H                                                                                               | -4.24785300 | -0.02635900 | -0.56852100 |
| H                                                                                               | -5.01228300 | -1.35595000 | -0.34298300 |
| H                                                                                               | -3.73756700 | 1.69983100  | -2.28107100 |
| H                                                                                               | -3.23610800 | 0.25834300  | -2.67584500 |
| H                                                                                               | 3.86388200  | 1.09649900  | -1.39796600 |
| H                                                                                               | 3.66407700  | 0.99698900  | -2.95711400 |
| H                                                                                               | 0.35519200  | -5.08083400 | 0.06187600  |
| H                                                                                               | -0.21899300 | -3.81108100 | -0.62501300 |
| Cl                                                                                              | -1.34398500 | -1.81807000 | -0.76225700 |
| H                                                                                               | -3.37678100 | -1.72820600 | -4.02523900 |
| O                                                                                               | -2.72957800 | -1.11006200 | -3.64593800 |
| H                                                                                               | -2.25734100 | -1.60898700 | -2.95794800 |
| Cl                                                                                              | 1.47391100  | 1.62157800  | 0.86004400  |
| O                                                                                               | 0.34937400  | 0.93343100  | 4.00268500  |
| H                                                                                               | 1.07825300  | 1.13510700  | 4.61308200  |
| H                                                                                               | 0.65778700  | 1.21929800  | 3.12544600  |
| <b>{[Al(H<sub>2</sub>O)<sub>5</sub>Cl]·(H<sub>2</sub>O)<sub>13</sub>Cl}<sup>+</sup> (11+10)</b> |             |             |             |
| Al                                                                                              | -0.24755400 | 0.35293300  | -0.41409600 |
| O                                                                                               | -1.31637000 | -0.36236000 | 0.99253700  |
| O                                                                                               | -0.35607800 | 2.12693300  | 0.31707200  |
| O                                                                                               | 1.31674100  | 0.02544800  | 0.70587900  |
| O                                                                                               | 0.91370500  | 1.05808900  | -1.73805500 |
| O                                                                                               | 0.03835000  | -1.40113900 | -1.14965500 |
| O                                                                                               | -1.61065500 | 0.66430500  | 3.34831000  |
| O                                                                                               | -1.73003400 | -3.03237800 | 1.13999900  |
| O                                                                                               | 2.03558700  | 3.44492500  | 0.24658400  |
| O                                                                                               | -2.30156500 | 2.98986100  | 1.88228600  |
| O                                                                                               | 0.99351200  | -3.29240900 | 2.10034100  |
| O                                                                                               | 3.72726000  | 1.13881200  | 0.30384500  |
| O                                                                                               | 4.13053200  | -1.15056800 | -1.21979900 |
| O                                                                                               | 1.09644900  | 3.61670000  | -2.38124000 |
| O                                                                                               | -1.82841900 | -3.27907100 | -1.60431700 |
| O                                                                                               | 2.11944700  | -2.88178200 | -0.31723000 |
| O                                                                                               | -4.29370700 | 2.06065900  | 0.31490500  |
| O                                                                                               | -3.94208600 | -1.93298200 | -2.56296900 |
| H                                                                                               | -1.44988500 | 0.04611100  | 1.90691100  |
| H                                                                                               | -1.53306600 | -1.32648100 | 1.03868500  |
| H                                                                                               | 0.47510200  | 2.65046700  | 0.41728900  |
| H                                                                                               | -1.08090900 | 2.51433700  | 0.88313600  |
| H                                                                                               | 1.24254800  | -0.18305700 | 1.67474000  |
| H                                                                                               | 2.19423500  | 0.46393800  | 0.57364800  |
| H                                                                                               | 1.46504900  | 0.50414800  | -2.36349800 |
| H                                                                                               | 0.91702800  | 2.00474900  | -2.05117700 |



|    |             |             |             |
|----|-------------|-------------|-------------|
| H  | -0.67029900 | -2.02791000 | -1.44403600 |
| H  | 0.82613300  | -1.93913100 | -0.86465600 |
| H  | -1.75654900 | 1.61888100  | 3.22893000  |
| H  | -0.71854700 | 0.53253700  | 3.72527800  |
| H  | 2.77628100  | 2.80847300  | 0.23068100  |
| H  | 2.28000700  | 4.13490000  | 0.88905700  |
| H  | 0.04376700  | -3.31032700 | 1.88216100  |
| H  | 1.10077000  | -2.52587200 | 2.69919800  |
| H  | -1.88595900 | -3.33770800 | 0.22047900  |
| H  | -2.47464600 | -3.36358700 | 1.67331100  |
| H  | -3.13158700 | 2.73218200  | 1.40987000  |
| H  | -2.36750400 | 3.94109600  | 2.07637100  |
| H  | 4.07342200  | 0.44205400  | -0.29549900 |
| H  | 4.33248800  | 1.15364400  | 1.06769900  |
| H  | 3.55401700  | -1.82032500 | -0.79226600 |
| H  | 5.00194200  | -1.56890300 | -1.33511600 |
| H  | -2.64194100 | -2.91848600 | -2.03918800 |
| H  | -1.56227100 | -4.07060500 | -2.10495200 |
| H  | -4.96023500 | 1.45347800  | 0.67872800  |
| H  | -3.78712000 | 1.54076400  | -0.33416200 |
| H  | 1.56475200  | 3.91097700  | -1.57898800 |
| H  | 1.64688800  | 3.88627100  | -3.13583000 |
| H  | 1.82682100  | -3.07137300 | 0.61381600  |
| H  | 2.21230800  | -3.74805900 | -0.75374600 |
| H  | -4.26626700 | -1.99955400 | -3.47728300 |
| H  | -3.57911000 | -1.03564100 | -2.47408700 |
| Cl | -2.14408100 | 0.67383600  | -1.73473000 |
| H  | 2.25416700  | -0.92900300 | -3.91105500 |
| O  | 2.55977300  | -0.23007800 | -3.30897900 |
| H  | 3.22548800  | -0.64055000 | -2.71877700 |
| Cl | 1.30004400  | -0.53350000 | 3.71187500  |

**{[Al(H<sub>2</sub>O)<sub>6</sub>](H<sub>2</sub>O)<sub>12</sub>Cl<sub>2</sub>]<sup>+</sup> (2O)**

|    |             |             |             |
|----|-------------|-------------|-------------|
| Al | -0.00096300 | -0.00149300 | 0.00125900  |
| O  | -1.86530600 | 0.28454300  | 0.27430100  |
| O  | -0.30203500 | -0.64537400 | -1.79061200 |
| O  | 0.15912600  | 1.76520200  | -0.69348500 |
| O  | 1.86485600  | -0.29252600 | -0.26921500 |
| O  | 0.30388200  | 0.64987700  | 1.79119300  |
| O  | -0.15743200 | -1.76637600 | 0.70135400  |
| O  | -4.49339800 | -2.73937000 | 0.04229900  |
| O  | -4.15290400 | 3.01409300  | -0.15916900 |
| O  | 2.14333500  | 0.26978300  | -2.86462600 |
| O  | 0.18389800  | -3.15521100 | -2.28348900 |
| O  | -1.55338500 | 3.69871700  | -0.09015000 |
| O  | 2.39151100  | 2.76327100  | -1.70981400 |
| O  | 4.50290200  | 2.72638700  | -0.04961400 |
| O  | 4.15119900  | -2.99493200 | 0.12910700  |
| O  | -2.14660100 | -0.26982400 | 2.86801900  |
| O  | -0.19024500 | 3.16327700  | 2.28804100  |
| O  | 1.55650000  | -3.69555500 | 0.08346100  |
| O  | -2.39090900 | -2.76869700 | 1.71591700  |
| H  | -2.62413600 | 0.17908500  | -0.36918700 |
| H  | -2.19826700 | 0.21806300  | 1.20238600  |

|    |             |             |             |
|----|-------------|-------------|-------------|
| H  | 0.22455100  | -0.20261700 | -2.48471600 |
| H  | -0.22518100 | -1.63345800 | -1.97375200 |
| H  | -0.52746100 | 2.47424500  | -0.55517600 |
| H  | 1.00144000  | 2.18347600  | -1.02598500 |
| H  | 2.20042600  | -0.22808800 | -1.19586400 |
| H  | 2.62268000  | -0.18370600 | 0.37467200  |
| H  | -0.20501200 | 0.20018500  | 2.49345200  |
| H  | 0.21582600  | 1.63649700  | 1.97158900  |
| H  | 0.52733700  | -2.47573700 | 0.55572500  |
| H  | -0.99898400 | -2.18620100 | 1.03354600  |
| H  | -5.38473300 | -2.88559800 | 0.40043800  |
| H  | -4.53768500 | -1.88889500 | -0.44245800 |
| H  | 2.39000900  | 1.21547100  | -2.82130800 |
| H  | 2.65643400  | -0.13268500 | -3.58708900 |
| H  | -2.52035900 | 3.47720900  | -0.13520900 |
| H  | -1.44169000 | 4.53868000  | -0.56985800 |
| H  | -4.80324700 | 3.63461500  | -0.52789900 |
| H  | -4.32574400 | 2.15200500  | -0.58924100 |
| H  | 0.68133600  | -3.56798100 | -1.54892700 |
| H  | -0.48047800 | -3.80188300 | -2.57493600 |
| H  | 3.19844000  | 2.78595700  | -1.13118600 |
| H  | 2.32482500  | 3.63652600  | -2.13481100 |
| H  | 5.39324600  | 2.86066300  | -0.41480600 |
| H  | 4.54216600  | 1.87919200  | 0.44167000  |
| H  | -2.39568600 | -1.21475900 | 2.82635800  |
| H  | -2.66461500 | 0.13601700  | 3.58494100  |
| H  | 2.52258100  | -3.46865700 | 0.12062800  |
| H  | 1.45257100  | -4.53656100 | 0.56319400  |
| H  | 4.82151400  | -3.61704300 | 0.45680300  |
| H  | 4.32974400  | -2.14084600 | 0.57286800  |
| H  | -0.68308100 | 3.57197600  | 1.54829200  |
| H  | 0.47414200  | 3.81096500  | 2.57770800  |
| H  | -3.19389000 | -2.79674700 | 1.13234000  |
| H  | -2.32488400 | -3.63980900 | 2.14527700  |
| Cl | -4.34448400 | 0.08565600  | -1.39134900 |
| Cl | 4.34027300  | -0.08732800 | 1.40287900  |

**{[Al(H<sub>2</sub>O)<sub>3</sub>Cl<sub>3</sub>](H<sub>2</sub>O)<sub>15</sub>]<sup>0</sup> (3I)}**

|    |             |             |             |
|----|-------------|-------------|-------------|
| Al | 0.09888800  | -0.03743400 | 0.04742900  |
| O  | -1.68955200 | 0.51849600  | -0.19275000 |
| O  | -0.54113800 | -1.04914600 | 1.56384100  |
| O  | 1.85559000  | -0.68423300 | 0.41779500  |
| O  | 2.24922100  | 4.04773100  | -1.97470400 |
| O  | 3.55257600  | -0.65870300 | -2.67864100 |
| O  | -3.89473200 | -0.89723500 | 0.37555600  |
| O  | -3.06096300 | 2.73514100  | -0.35694700 |
| O  | 2.55952400  | -3.21655300 | -2.00679000 |
| O  | -3.19688900 | -3.37937100 | -0.48304300 |
| O  | 1.09380600  | -2.49971200 | 3.00945400  |
| O  | -2.85020100 | -0.22414400 | 2.80937100  |
| O  | 4.11070300  | 0.60863100  | -0.16235400 |
| O  | 2.79448700  | -3.16790700 | 0.69796600  |
| O  | -2.57648400 | 2.60625200  | 2.40450100  |
| O  | 3.38664400  | 3.14182900  | 0.38135000  |

|                                                                                                             |             |             |             |
|-------------------------------------------------------------------------------------------------------------|-------------|-------------|-------------|
| H                                                                                                           | -2.46297700 | -0.07555300 | -0.00095700 |
| H                                                                                                           | -2.04807500 | 1.44390600  | -0.33417100 |
| H                                                                                                           | 0.04682900  | -1.64772500 | 2.11345300  |
| H                                                                                                           | -1.31440700 | -0.75227200 | 2.09893600  |
| H                                                                                                           | 2.67491600  | -0.14912500 | 0.22889700  |
| H                                                                                                           | 2.14565800  | -1.62757200 | 0.53354700  |
| H                                                                                                           | 1.68680400  | 4.83944700  | -2.00408300 |
| H                                                                                                           | 1.64093000  | 3.29104000  | -2.02973400 |
| H                                                                                                           | -3.79421700 | -1.83424900 | 0.08361300  |
| H                                                                                                           | -4.50759500 | -0.44579300 | -0.23951400 |
| H                                                                                                           | 2.98985400  | -2.37909700 | -2.28600000 |
| H                                                                                                           | 1.61168800  | -3.00289900 | -2.02869600 |
| H                                                                                                           | 3.90815000  | -0.22186200 | -1.88248800 |
| H                                                                                                           | 2.73081400  | -0.17223900 | -2.84749600 |
| H                                                                                                           | -3.15470200 | 2.83020800  | 0.61325600  |
| H                                                                                                           | -3.87553000 | 2.32108200  | -0.69602200 |
| H                                                                                                           | -3.15629700 | -4.11906300 | 0.14610400  |
| H                                                                                                           | -2.27231900 | -3.16839300 | -0.70484600 |
| H                                                                                                           | 1.68541400  | -2.98026000 | 2.40815400  |
| H                                                                                                           | 1.61549000  | -1.75334100 | 3.37941700  |
| H                                                                                                           | 3.94842200  | 1.57838400  | -0.01508400 |
| H                                                                                                           | 4.89110800  | 0.37417600  | 0.36940600  |
| H                                                                                                           | -2.75386500 | 1.68309500  | 2.66593100  |
| H                                                                                                           | -1.61511900 | 2.61588000  | 2.26912100  |
| H                                                                                                           | -3.48412500 | -0.52856700 | 2.12647200  |
| H                                                                                                           | -3.13509800 | -0.61426900 | 3.65425000  |
| H                                                                                                           | 2.78611400  | -3.37521400 | -0.27029200 |
| H                                                                                                           | 3.72482900  | -3.22882600 | 0.97820600  |
| H                                                                                                           | 3.06979400  | 3.58593000  | -0.43447100 |
| H                                                                                                           | 2.56865700  | 2.92175600  | 0.85834800  |
| Cl                                                                                                          | 0.56386600  | 1.81654400  | 1.51164800  |
| H                                                                                                           | 2.06921500  | 0.27460300  | 4.65508400  |
| O                                                                                                           | 2.20335300  | -0.09001100 | 3.76452500  |
| H                                                                                                           | 1.77002700  | 0.53658300  | 3.15976800  |
| Cl                                                                                                          | -0.39655500 | -1.95878800 | -1.33810700 |
| O                                                                                                           | -2.84303400 | -0.31347700 | -3.23766200 |
| H                                                                                                           | -2.10213700 | -0.66761900 | -2.71960200 |
| H                                                                                                           | -2.43091300 | 0.24485200  | -3.91791700 |
| Cl                                                                                                          | 0.78608200  | 1.13899900  | -1.82201300 |
| H                                                                                                           | -4.17973700 | 0.45396000  | -2.28383000 |
| O                                                                                                           | -4.79228500 | 0.81867500  | -1.60638500 |
| H                                                                                                           | -5.65581700 | 0.92075700  | -2.03998300 |
| <b>{[Al(H<sub>2</sub>O)<sub>4</sub>Cl<sub>2</sub>](H<sub>2</sub>O)<sub>14</sub>Cl]<sup>0</sup> (2I+1O)}</b> |             |             |             |
| Al                                                                                                          | -0.09681300 | -0.31477800 | -0.47584800 |
| O                                                                                                           | 1.62344400  | 0.51128200  | -0.37694200 |
| O                                                                                                           | -0.74862600 | 0.89265100  | 0.94663200  |
| O                                                                                                           | -1.80283900 | -1.14166200 | -0.69698200 |
| O                                                                                                           | 0.66218400  | -1.53990300 | -1.78242300 |
| O                                                                                                           | 4.67433900  | -1.08730200 | 0.04962400  |
| O                                                                                                           | 2.06966600  | 3.87062700  | 0.03998100  |
| O                                                                                                           | -3.71055600 | -2.62304700 | 2.34861700  |
| O                                                                                                           | 3.35585900  | -3.08920000 | 1.43154500  |
| O                                                                                                           | -0.61725400 | 3.59703600  | 0.64418800  |

|                                                                                                             |             |             |             |
|-------------------------------------------------------------------------------------------------------------|-------------|-------------|-------------|
| O                                                                                                           | -3.44784600 | 0.09473600  | 2.02250600  |
| O                                                                                                           | -4.69684000 | 1.50833800  | -0.02120300 |
| O                                                                                                           | -2.57847200 | -3.55636700 | 0.09669200  |
| O                                                                                                           | 2.87786600  | 1.63785400  | -2.41866700 |
| O                                                                                                           | -3.27714200 | 3.89398500  | -0.36625700 |
| O                                                                                                           | -0.18637200 | -4.06587600 | -1.46942300 |
| O                                                                                                           | 3.32899400  | -1.13402500 | -2.31937700 |
| H                                                                                                           | 2.17066300  | 0.71694100  | 0.41763000  |
| H                                                                                                           | 1.97071300  | 1.05162500  | -1.13907200 |
| H                                                                                                           | -0.79664800 | 1.85609700  | 0.71726500  |
| H                                                                                                           | -0.23711600 | 0.87121200  | 1.80907800  |
| H                                                                                                           | -2.50852600 | -0.75658100 | -1.27138900 |
| H                                                                                                           | -2.07677700 | -2.04703400 | -0.38700800 |
| H                                                                                                           | 0.39574800  | -2.49511400 | -1.71546300 |
| H                                                                                                           | 1.62889600  | -1.47854500 | -1.97389000 |
| H                                                                                                           | 4.28581700  | -1.82608800 | 0.56773200  |
| H                                                                                                           | 4.45908600  | -0.28528000 | 0.55674600  |
| H                                                                                                           | -3.65411300 | -1.64294500 | 2.25087700  |
| H                                                                                                           | -3.33777200 | -2.82631500 | 3.22128900  |
| H                                                                                                           | 0.30095400  | 3.74331400  | 0.32023100  |
| H                                                                                                           | -0.65340000 | 4.02856600  | 1.51663100  |
| H                                                                                                           | 2.41861200  | 3.71921600  | -0.85042700 |
| H                                                                                                           | 2.55951400  | 3.25343500  | 0.61853400  |
| H                                                                                                           | 3.34647300  | -3.98817200 | 1.06317600  |
| H                                                                                                           | 2.43169600  | -2.78142200 | 1.39478300  |
| H                                                                                                           | -3.99434900 | 0.57020100  | 1.35736000  |
| H                                                                                                           | -2.54105400 | 0.25050300  | 1.71433900  |
| H                                                                                                           | -4.21008100 | 2.35220600  | -0.12908400 |
| H                                                                                                           | -4.48739500 | 0.99432200  | -0.81959100 |
| H                                                                                                           | 3.20030100  | 0.75215300  | -2.67906200 |
| H                                                                                                           | 2.40148700  | 1.98449300  | -3.19125200 |
| H                                                                                                           | -0.90256800 | -4.06156900 | -0.80980400 |
| H                                                                                                           | -0.54116900 | -4.54471800 | -2.23770500 |
| H                                                                                                           | -2.94959400 | -3.33823800 | 0.99099500  |
| H                                                                                                           | -3.31937300 | -3.92624500 | -0.41521600 |
| H                                                                                                           | -2.33197500 | 3.84784200  | -0.13229200 |
| H                                                                                                           | -3.61217400 | 4.70255900  | 0.05356400  |
| H                                                                                                           | 3.86001200  | -1.15041100 | -1.48112100 |
| H                                                                                                           | 3.79341900  | -1.70585000 | -2.95421200 |
| Cl                                                                                                          | -0.70032100 | 1.22387800  | -2.08661700 |
| Cl                                                                                                          | 0.38656300  | -1.80763100 | 1.24995400  |
| Cl                                                                                                          | 3.48935500  | 1.52294300  | 1.79809500  |
| O                                                                                                           | 0.65158600  | 1.14219200  | 3.19470100  |
| H                                                                                                           | 0.63073100  | 0.40237700  | 3.82488100  |
| H                                                                                                           | 1.59103900  | 1.23864700  | 2.93342800  |
| H                                                                                                           | -3.27020000 | 0.49585800  | -2.92432200 |
| O                                                                                                           | -3.72994500 | -0.06350200 | -2.27212100 |
| H                                                                                                           | -4.33183300 | -0.63368100 | -2.78466500 |
| <b>{[Al(H<sub>2</sub>O)<sub>5</sub>Cl]·(H<sub>2</sub>O)<sub>13</sub>Cl<sub>2</sub>}<sup>0</sup> (11+20)</b> |             |             |             |
| Al                                                                                                          | 0.20460300  | -0.05092900 | 0.15166400  |
| O                                                                                                           | -1.53930500 | -0.58863500 | -0.40547500 |
| O                                                                                                           | -0.49860700 | 0.86175300  | 1.66936500  |
| O                                                                                                           | 1.93213700  | 0.65640900  | 0.57077100  |

|    |             |             |             |
|----|-------------|-------------|-------------|
| O  | 0.90458600  | -0.92619400 | -1.41873000 |
| O  | -0.01693900 | 1.54220300  | -0.94710400 |
| O  | -3.52837500 | 2.89394400  | 0.09815000  |
| O  | -4.18344800 | -2.46802700 | -1.15454800 |
| O  | 3.20425000  | 0.25947300  | 2.81143600  |
| O  | -1.08609300 | 3.43455800  | 1.48746800  |
| O  | -1.75965000 | -3.83123400 | -0.41676200 |
| O  | 3.70949900  | -2.32036100 | 2.09020900  |
| O  | 5.04384300  | -2.16111700 | -0.33734000 |
| O  | 3.67286800  | 3.51160900  | -0.89711900 |
| O  | -2.59665400 | -0.72074400 | -2.76242500 |
| O  | 0.35006100  | -3.37573100 | -2.10875400 |
| O  | 1.02169000  | 3.96237500  | -0.47739600 |
| O  | -2.32609300 | 2.09307700  | -2.26418600 |
| H  | -2.33498000 | -0.39976800 | 0.14515500  |
| H  | -1.85408100 | -0.67141700 | -1.36172700 |
| H  | -1.04402100 | 0.43428700  | 2.38689900  |
| H  | -0.70567900 | 1.83884500  | 1.63131800  |
| H  | 2.37518300  | 0.55119900  | 1.46976100  |
| H  | 2.63232800  | 0.61254700  | -0.12382000 |
| H  | 1.75064300  | -0.61236600 | -1.80082700 |
| H  | 0.75134100  | -1.89291900 | -1.66300300 |
| H  | 0.42489800  | 2.41602400  | -0.78620700 |
| H  | -0.83676900 | 1.70985900  | -1.47532600 |
| H  | -4.28037000 | 3.51153600  | 0.12477400  |
| H  | -3.86264100 | 2.04687200  | 0.46385500  |
| H  | 3.51871100  | -0.66645400 | 2.67613600  |
| H  | 3.99108700  | 0.80141000  | 2.98592000  |
| H  | -2.59671600 | -3.39615300 | -0.67175800 |
| H  | -1.38760700 | -3.28441600 | 0.29277800  |
| H  | -4.96956900 | -3.01560500 | -1.32163800 |
| H  | -4.43910600 | -1.84176800 | -0.44976100 |
| H  | -0.41229900 | 3.85126400  | 0.92334100  |
| H  | -1.92621000 | 3.45584100  | 0.98923300  |
| H  | 4.21014700  | -2.29522200 | 1.24536500  |
| H  | 2.79165400  | -2.51122200 | 1.84020700  |
| H  | 6.01415400  | -2.12791900 | -0.34211100 |
| H  | 4.75202900  | -1.37922900 | -0.84354100 |
| H  | -2.87550800 | 0.20354100  | -2.87856600 |
| H  | -3.39182800 | -1.24933000 | -2.56723300 |
| H  | 2.00315800  | 3.86034900  | -0.53481700 |
| H  | 0.79098000  | 4.63699300  | -1.13988000 |
| H  | 4.32509400  | 3.60717000  | -0.18354800 |
| H  | 3.79374400  | 2.60899100  | -1.24776600 |
| H  | -0.43802900 | -3.63636500 | -1.57564300 |
| H  | 1.01728300  | -4.06543800 | -1.95779400 |
| H  | -2.87350100 | 2.48440200  | -1.54795600 |
| H  | -2.27851100 | 2.76184500  | -2.96943600 |
| C1 | -4.25679700 | -0.07120800 | 1.01041800  |
| C1 | 3.75840800  | 0.39112100  | -1.86482200 |
| C1 | 0.43786300  | -1.97567600 | 1.43322500  |
| H  | -2.04459000 | -0.97937900 | 3.84356500  |
| O  | -2.20809700 | -0.11406800 | 3.43240600  |

|                                                                                                                   |             |             |             |
|-------------------------------------------------------------------------------------------------------------------|-------------|-------------|-------------|
| H                                                                                                                 | -2.98671600 | -0.23227200 | 2.85271600  |
| <b>{[Al(H<sub>2</sub>O)<sub>6</sub>]<sup>+</sup>(H<sub>2</sub>O)<sub>12</sub>Cl<sub>3</sub>}<sup>0</sup> (30)</b> |             |             |             |
| Al                                                                                                                | 0.09888800  | -0.03743400 | 0.04742900  |
| O                                                                                                                 | -1.68955200 | 0.51849600  | -0.19275000 |
| O                                                                                                                 | -0.54113800 | -1.04914600 | 1.56384100  |
| O                                                                                                                 | 1.85559000  | -0.68423300 | 0.41779500  |
| O                                                                                                                 | 2.24922100  | 4.04773100  | -1.97470400 |
| O                                                                                                                 | 3.55257600  | -0.65870300 | -2.67864100 |
| O                                                                                                                 | -3.89473200 | -0.89723500 | 0.37555600  |
| O                                                                                                                 | -3.06096300 | 2.73514100  | -0.35694700 |
| O                                                                                                                 | 2.55952400  | -3.21655300 | -2.00679000 |
| O                                                                                                                 | -3.19688900 | -3.37937100 | -0.48304300 |
| O                                                                                                                 | 1.09380600  | -2.49971200 | 3.00945400  |
| O                                                                                                                 | -2.85020100 | -0.22414400 | 2.80937100  |
| O                                                                                                                 | 4.11070300  | 0.60863100  | -0.16235400 |
| O                                                                                                                 | 2.79448700  | -3.16790700 | 0.69796600  |
| O                                                                                                                 | -2.57648400 | 2.60625200  | 2.40450100  |
| O                                                                                                                 | 3.38664400  | 3.14182900  | 0.38135000  |
| H                                                                                                                 | -2.46297700 | -0.07555300 | -0.00095700 |
| H                                                                                                                 | -2.04807500 | 1.44390600  | -0.33417100 |
| H                                                                                                                 | 0.04682900  | -1.64772500 | 2.11345300  |
| H                                                                                                                 | -1.31440700 | -0.75227200 | 2.09893600  |
| H                                                                                                                 | 2.67491600  | -0.14912500 | 0.22889700  |
| H                                                                                                                 | 2.14565800  | -1.62757200 | 0.53354700  |
| H                                                                                                                 | 1.68680400  | 4.83944700  | -2.00408300 |
| H                                                                                                                 | 1.64093000  | 3.29104000  | -2.02973400 |
| H                                                                                                                 | -3.79421700 | -1.83424900 | 0.08361300  |
| H                                                                                                                 | -4.50759500 | -0.44579300 | -0.23951400 |
| H                                                                                                                 | 2.98985400  | -2.37909700 | -2.28600000 |
| H                                                                                                                 | 1.61168800  | -3.00289900 | -2.02869600 |
| H                                                                                                                 | 3.90815000  | -0.22186200 | -1.88248800 |
| H                                                                                                                 | 2.73081400  | -0.17223900 | -2.84749600 |
| H                                                                                                                 | -3.15470200 | 2.83020800  | 0.61325600  |
| H                                                                                                                 | -3.87553000 | 2.32108200  | -0.69602200 |
| H                                                                                                                 | -3.15629700 | -4.11906300 | 0.14610400  |
| H                                                                                                                 | -2.27231900 | -3.16839300 | -0.70484600 |
| H                                                                                                                 | 1.68541400  | -2.98026000 | 2.40815400  |
| H                                                                                                                 | 1.61549000  | -1.75334100 | 3.37941700  |
| H                                                                                                                 | 3.94842200  | 1.57838400  | -0.01508400 |
| H                                                                                                                 | 4.89110800  | 0.37417600  | 0.36940600  |
| H                                                                                                                 | -2.75386500 | 1.68309500  | 2.66593100  |
| H                                                                                                                 | -1.61511900 | 2.61588000  | 2.26912100  |
| H                                                                                                                 | -3.48412500 | -0.52856700 | 2.12647200  |
| H                                                                                                                 | -3.13509800 | -0.61426900 | 3.65425000  |
| H                                                                                                                 | 2.78611400  | -3.37521400 | -0.27029200 |
| H                                                                                                                 | 3.72482900  | -3.22882600 | 0.97820600  |
| H                                                                                                                 | 3.06979400  | 3.58593000  | -0.43447100 |
| H                                                                                                                 | 2.56865700  | 2.92175600  | 0.85834800  |
| Cl                                                                                                                | 0.56386600  | 1.81654400  | 1.51164800  |
| H                                                                                                                 | 2.06921500  | 0.27460300  | 4.65508400  |
| O                                                                                                                 | 2.20335300  | -0.09001100 | 3.76452500  |
| H                                                                                                                 | 1.77002700  | 0.53658300  | 3.15976800  |
| Cl                                                                                                                | -0.39655500 | -1.95878800 | -1.33810700 |

|                                                                                               |             |             |             |
|-----------------------------------------------------------------------------------------------|-------------|-------------|-------------|
| O                                                                                             | -2.84303400 | -0.31347700 | -3.23766200 |
| H                                                                                             | -2.10213700 | -0.66761900 | -2.71960200 |
| H                                                                                             | -2.43091300 | 0.24485200  | -3.91791700 |
| Cl                                                                                            | 0.78608200  | 1.13899900  | -1.82201300 |
| H                                                                                             | -4.17973700 | 0.45396000  | -2.28383000 |
| O                                                                                             | -4.79228500 | 0.81867500  | -1.60638500 |
| H                                                                                             | -5.65581700 | 0.92075700  | -2.03998300 |
| <b>[[Al(OH)(H<sub>2</sub>O)<sub>4</sub>Cl]·(H<sub>2</sub>O)<sub>13</sub>]<sup>+</sup> (I)</b> |             |             |             |
| Al                                                                                            | -0.34449500 | 0.16421200  | -0.14682200 |
| O                                                                                             | -0.96908400 | 1.51501500  | -1.19561600 |
| O                                                                                             | -1.42355700 | -1.17007700 | -1.06933100 |
| O                                                                                             | 1.10914100  | -0.25903800 | -1.37852800 |
| O                                                                                             | 0.80969200  | 1.38487000  | 0.80931400  |
| O                                                                                             | -1.79507100 | 0.50976000  | 1.12792000  |
| O                                                                                             | -3.50007400 | 2.21193300  | -1.45702900 |
| O                                                                                             | 2.02139300  | 3.96292100  | -1.09510500 |
| O                                                                                             | -0.67222100 | -3.75622500 | -1.18997800 |
| O                                                                                             | -4.08706500 | -0.67180000 | -1.27218000 |
| O                                                                                             | 3.16182000  | 1.52004400  | -1.48244400 |
| O                                                                                             | 1.96868000  | -2.81763900 | -1.58038200 |
| O                                                                                             | 4.14066100  | -2.61319900 | 0.02298300  |
| O                                                                                             | -2.01695100 | -3.60827700 | 1.40662800  |
| O                                                                                             | -0.09164700 | 3.93356400  | 0.85594100  |
| O                                                                                             | 4.54315100  | 0.14999500  | 0.49932800  |
| O                                                                                             | -3.69632300 | -1.44945100 | 1.35838400  |
| O                                                                                             | -2.75889100 | 3.05638700  | 0.95847400  |
| H                                                                                             | -2.54016300 | 1.92988800  | -1.46677200 |
| H                                                                                             | -0.47773200 | 1.66757000  | -2.01546200 |
| H                                                                                             | -1.23849800 | -2.14046200 | -1.11090600 |
| H                                                                                             | -2.36041500 | -0.98428800 | -1.31357300 |
| H                                                                                             | 1.87821000  | 0.35972200  | -1.42723600 |
| H                                                                                             | 1.42507000  | -1.19039100 | -1.49411600 |
| H                                                                                             | 0.52541700  | 2.32561700  | 0.89362400  |
| H                                                                                             | 1.48103600  | 1.15383900  | 1.50727100  |
| H                                                                                             | -2.48555500 | -0.16876700 | 1.31422400  |
| H                                                                                             | -2.19215500 | 1.41277500  | 1.16621000  |
| H                                                                                             | -3.98254000 | 1.36982700  | -1.44633100 |
| H                                                                                             | 0.29555600  | -3.60479200 | -1.22756900 |
| H                                                                                             | -0.89673300 | -4.27576500 | -1.98121100 |
| H                                                                                             | 2.78061300  | 2.41644700  | -1.30700500 |
| H                                                                                             | 3.60982900  | 1.58098600  | -2.34470500 |
| H                                                                                             | 1.25384400  | 4.06358900  | -0.50326300 |
| H                                                                                             | 2.54278500  | 4.77721200  | -1.00902900 |
| H                                                                                             | -4.24527900 | -1.00264200 | -0.36388700 |
| H                                                                                             | -4.70005800 | -1.15048300 | -1.85574900 |
| H                                                                                             | 2.72604600  | -2.81957500 | -0.94100000 |
| H                                                                                             | 2.34080500  | -3.08810100 | -2.43813900 |
| H                                                                                             | 4.29967000  | -1.66967300 | 0.22977600  |
| H                                                                                             | 4.10843200  | -3.06832300 | 0.88011300  |
| H                                                                                             | -1.05826500 | 3.76894700  | 0.80730900  |
| H                                                                                             | 0.05053700  | 4.49908600  | 1.63488400  |
| H                                                                                             | -3.19655400 | -2.30301600 | 1.38209700  |
| H                                                                                             | -4.32976600 | -1.47331600 | 2.09624300  |

|    |             |             |             |
|----|-------------|-------------|-------------|
| H  | -1.79597100 | -3.98312500 | 0.53769100  |
| H  | -1.21587200 | -3.08969300 | 1.61010000  |
| H  | 4.14751000  | 0.71247400  | -0.20266800 |
| H  | 5.47467300  | 0.42091700  | 0.57213900  |
| H  | -3.21982200 | 2.88492600  | 0.09457100  |
| H  | -3.40705500 | 3.45054400  | 1.56637500  |
| Cl | 0.42233800  | -1.54898400 | 1.30942800  |
| O  | 2.72472100  | 0.72826800  | 2.53915500  |
| H  | 2.48825800  | -0.09206700 | 3.00051200  |
| H  | 3.46583200  | 0.49169300  | 1.94361700  |

**{[Al(OH)(H<sub>2</sub>O)<sub>5</sub>](H<sub>2</sub>O)<sub>12</sub>Cl}<sup>+</sup> (O)**

|    |             |             |             |
|----|-------------|-------------|-------------|
| Al | 0.44777300  | 0.12219200  | -0.34699200 |
| O  | 2.00975200  | 0.77091300  | -0.93334100 |
| O  | -0.60964300 | 1.16881900  | -1.59961900 |
| O  | 0.39089100  | -1.41249100 | -1.63318100 |
| O  | -1.18085500 | -0.60279500 | 0.28931300  |
| O  | 1.38196000  | -1.05056300 | 0.92815300  |
| O  | 0.30945500  | 1.49956100  | 1.00951300  |
| O  | 2.62865300  | 3.35693900  | -0.74001800 |
| O  | 4.24215200  | -1.61705800 | -0.70587300 |
| O  | -3.16600200 | 0.36953900  | -2.13543400 |
| O  | -0.30038600 | 3.86804000  | -1.45988000 |
| O  | 2.20415900  | -3.39750400 | -1.05130100 |
| O  | -2.24580100 | -2.34890600 | -2.15712400 |
| O  | -2.24269000 | -3.05986800 | 0.47626500  |
| O  | -3.75741100 | 1.74220700  | 0.44652700  |
| O  | 3.80332000  | -0.06527000 | 1.64369200  |
| O  | 0.59496200  | -3.67373400 | 1.28891800  |
| O  | -1.69969000 | 3.29109800  | 0.85157600  |
| O  | 2.77087800  | 2.50273600  | 1.70330600  |
| H  | 2.43840600  | 2.42021800  | -1.00043000 |
| H  | 2.55152700  | 0.23376700  | -1.51629500 |
| H  | -1.55576700 | 0.98076500  | -1.79567900 |
| H  | -0.42187000 | 2.12464700  | -1.74322400 |
| H  | 1.01670400  | -2.16488000 | -1.52199200 |
| H  | -0.45509000 | -1.75239100 | -1.99061700 |
| H  | -1.39335900 | -1.55868700 | 0.20258400  |
| H  | -1.76006100 | -0.36237200 | 1.09689000  |
| H  | 2.25564600  | -0.79321500 | 1.29994100  |
| H  | 1.03809100  | -1.86941500 | 1.33686100  |
| H  | -0.42431400 | 2.16471600  | 1.05351100  |
| H  | 1.13270200  | 1.88923300  | 1.38397200  |
| H  | 1.83831800  | 3.84853700  | -1.00409900 |
| H  | -3.04504900 | -0.59999100 | -2.16585900 |
| H  | -3.67947600 | 0.60887500  | -2.91537700 |
| H  | 3.01039300  | -2.84537700 | -0.89939300 |
| H  | 2.45841300  | -4.08178400 | -1.68127100 |
| H  | 4.24709400  | -1.01392000 | 0.06161800  |
| H  | 5.14970300  | -1.67794800 | -1.02110800 |
| H  | -0.87564500 | 3.93120700  | -0.66748400 |
| H  | -0.58692900 | 4.54881400  | -2.07861300 |
| H  | -2.43095700 | -2.79059900 | -1.29817500 |



|    |             |             |             |
|----|-------------|-------------|-------------|
| H  | -2.53264800 | -2.95456600 | -2.85040600 |
| H  | -1.56966500 | -3.59419500 | 0.92375300  |
| H  | -2.78021500 | -2.61267400 | 1.17326500  |
| H  | 3.57786700  | 0.89572300  | 1.63516200  |
| H  | 4.29360500  | -0.22590000 | 2.45789300  |
| H  | -2.52701100 | 2.73039800  | 0.69634400  |
| H  | -1.91131200 | 3.88400000  | 1.58191900  |
| H  | -3.77823700 | 1.26798700  | -0.39839800 |
| H  | -3.80111500 | 1.03813700  | 1.13104500  |
| H  | 1.19242400  | -3.87355000 | 0.54306800  |
| H  | 0.82035800  | -4.28417600 | 2.00034700  |
| H  | 2.81939900  | 2.99088900  | 0.82198500  |
| H  | 2.98740900  | 3.13075100  | 2.40123100  |
| Cl | -3.18764800 | -0.70322500 | 2.32270600  |

**{[Al(OH)(H<sub>2</sub>O)<sub>3</sub>Cl<sub>2</sub>](H<sub>2</sub>O)<sub>14</sub>]<sup>0</sup> (2I)}**

|    |             |             |             |
|----|-------------|-------------|-------------|
| Al | 0.45438100  | -0.65148500 | 0.16428100  |
| O  | 0.87834700  | 1.30310900  | 0.37536200  |
| O  | -1.05226800 | -0.34127300 | -0.83364700 |
| O  | 1.65903400  | -0.57304600 | -1.40881900 |
| O  | -4.27156100 | 1.93363200  | -0.68419900 |
| O  | -1.32719000 | 4.54661900  | -1.28663900 |
| O  | -1.88265000 | -2.48221900 | -2.28289000 |
| O  | -3.58482900 | -0.60186400 | 0.11604200  |
| O  | 2.68491200  | 1.88550100  | -1.57624600 |
| O  | 3.78932000  | -2.14667800 | -1.87163700 |
| O  | 4.61810200  | -0.83818000 | 0.37533900  |
| O  | -3.59558200 | -3.01340900 | -0.45272300 |
| O  | -0.90125500 | 3.67189000  | 1.17777100  |
| O  | 4.53450300  | 1.62669300  | 0.11146700  |
| O  | -2.12323500 | -3.62066000 | 1.58460200  |
| O  | -2.98968000 | 2.07892200  | 2.00615300  |
| H  | -4.99517000 | 2.52347300  | -0.91488100 |
| H  | 1.31254300  | 1.71987700  | -0.40246400 |
| H  | -1.53506200 | -1.64730200 | -1.86555800 |
| H  | -1.11847600 | 0.49902700  | -1.31073700 |
| H  | 2.09024400  | 0.27792900  | -1.66080900 |
| H  | 2.28750000  | -1.29860200 | -1.64272800 |
| H  | 3.05191600  | -0.97385100 | 0.95585700  |
| H  | -4.10165600 | 0.14673400  | -0.23036900 |
| H  | -1.11701200 | -3.07139800 | -2.24747800 |
| H  | -0.76926100 | 5.29868300  | -1.49966000 |
| H  | 2.82157300  | 2.51961800  | -2.28487600 |
| H  | -1.16908700 | 4.32023400  | -0.32860600 |
| H  | -1.66636900 | 3.07357300  | -2.04042100 |
| H  | -2.02869500 | -2.80500500 | 2.10443900  |
| H  | -2.63592500 | -0.42092100 | -0.12181300 |
| H  | 4.30555700  | -1.76062600 | -1.13154000 |
| H  | 4.34651300  | -2.12648400 | -2.65431700 |
| H  | 4.69368900  | 0.22011300  | 0.26031000  |
| H  | 5.32259900  | -1.12490900 | 0.96465500  |
| H  | -1.68463900 | 3.21935500  | 1.56368600  |
| H  | -0.25748000 | 2.95680400  | 1.07700100  |
| H  | -3.06837300 | -3.35095400 | 0.35621200  |

|    |             |             |             |
|----|-------------|-------------|-------------|
| H  | -1.23593800 | -3.70926400 | 1.18576900  |
| H  | -2.93421300 | -2.94160600 | -1.23911800 |
| H  | -3.77363200 | -2.00717900 | -0.22701600 |
| H  | 3.52681800  | 1.86687400  | -0.95887400 |
| H  | 5.35418400  | 2.11892400  | 0.01136100  |
| H  | -3.53029600 | 1.96908500  | 1.20822600  |
| H  | -2.59291200 | 1.21091400  | 2.17062200  |
| O  | 2.73354400  | 2.25142400  | 1.94256600  |
| H  | 3.53490400  | 2.07833600  | 1.36913100  |
| H  | 1.51280000  | 1.53652900  | 1.12308500  |
| H  | -3.54340100 | 2.09888300  | -1.32386900 |
| O  | -2.00958100 | 2.16906200  | -2.25734000 |
| H  | -2.04019200 | 2.10415900  | -3.21701900 |
| Cl | -0.65618500 | -0.67187400 | 2.19779000  |
| Cl | 0.45819200  | -2.97633700 | -0.11691700 |
| H  | 1.97097900  | -1.55361700 | 1.98811200  |
| O  | 2.11433000  | -0.90112600 | 1.29297600  |
| H  | 2.93077800  | 1.93432000  | 2.82810300  |

**[Al(OH)(H<sub>2</sub>O)<sub>4</sub>Cl]·(H<sub>2</sub>O)<sub>13</sub>Cl]<sup>0</sup> (II+10)**

|    |             |             |             |
|----|-------------|-------------|-------------|
| Al | 0.27365300  | 0.23664500  | -0.13559000 |
| O  | -0.01889700 | 1.76558100  | -1.32157100 |
| O  | -0.82035100 | -0.86826000 | -1.32153100 |
| O  | 1.79677500  | -0.27204600 | -1.02358400 |
| O  | 1.30210000  | 1.45097700  | 0.96558800  |
| O  | -1.34433700 | 0.87974400  | 0.70890200  |
| O  | -2.45785100 | 2.37453500  | -1.98661900 |
| O  | 2.43196900  | 3.12239100  | -1.90397200 |
| O  | -0.39937600 | -3.57403700 | -1.51753500 |
| O  | -3.30250900 | -0.31884200 | -2.17300400 |
| O  | 3.94922800  | 0.94944400  | -1.21689500 |
| O  | 2.31497900  | -3.32246600 | -1.55139900 |
| O  | 3.25231400  | -2.81347600 | 0.88582700  |
| O  | -2.39125600 | -3.37939100 | 0.64929900  |
| O  | 1.46830600  | 4.11660200  | 0.51470600  |
| O  | 4.76339500  | -0.32077100 | 1.10162900  |
| O  | -4.43913700 | -1.64943600 | -0.28610200 |
| O  | -3.15934000 | 2.98399500  | 0.65907500  |
| H  | -0.92248000 | 2.06427900  | -1.65646300 |
| H  | 0.72069500  | 2.21920000  | -1.76108700 |
| H  | -0.71244400 | -1.84326800 | -1.37494000 |
| H  | -1.72275700 | -0.63735900 | -1.65995500 |
| H  | 3.04786400  | 0.39936200  | -1.15690200 |
| H  | 1.82302000  | -1.14656000 | -1.42693300 |
| H  | 1.28545000  | 2.43294900  | 0.91434900  |
| H  | 1.83666400  | 1.14928300  | 1.74935300  |
| H  | -2.06862100 | 0.42132600  | 1.22222000  |
| H  | -1.62896700 | 1.81237200  | 0.68498500  |
| H  | -2.90921000 | 1.51618200  | -2.10688500 |
| H  | 0.58540300  | -3.62924600 | -1.50433200 |
| H  | -0.69324000 | -4.07262600 | -2.28657000 |
| H  | 3.09160800  | 2.41519500  | -1.68888100 |
| H  | 4.43748200  | 0.58935300  | -1.96524400 |
| H  | 1.90289700  | 4.03651400  | -0.35491400 |

|    |             |             |             |
|----|-------------|-------------|-------------|
| H  | 2.72210400  | 3.53965600  | -2.72104600 |
| H  | -3.81958000 | -0.81921900 | -1.44821400 |
| H  | -3.64716800 | -0.62279700 | -3.01864700 |
| H  | 2.74611900  | -3.20568000 | -0.66031400 |
| H  | 2.89717600  | -3.88743700 | -2.06788000 |
| H  | 3.84968600  | -2.04732900 | 0.93695000  |
| H  | 2.40251900  | -2.48521900 | 1.23438600  |
| H  | -3.30223300 | 3.78510800  | 1.17255400  |
| H  | 1.99498500  | 4.72469100  | 1.04172100  |
| H  | -3.81864300 | -2.33962700 | 0.02647600  |
| H  | -4.52240900 | -1.03861900 | 0.47864700  |
| H  | -1.68554200 | -3.62194700 | 0.03062100  |
| H  | -1.93445800 | -2.86601700 | 1.32936800  |
| H  | 4.57123000  | 0.21404600  | 0.29427600  |
| H  | 5.70610400  | -0.23619500 | 1.27591300  |
| H  | -2.86030400 | 2.75854700  | -1.18417100 |
| H  | -3.64778200 | 2.25578300  | 1.12918600  |
| Cl | 0.38567100  | -1.45311800 | 1.48160600  |
| O  | 2.78337800  | 0.51898500  | 2.94236700  |
| H  | 2.25807300  | -0.24199100 | 3.22184400  |
| H  | 3.54827600  | 0.15938200  | 2.45447000  |
| Cl | -3.96944200 | 0.39566400  | 2.02470500  |

**{[Al(OH)(H<sub>2</sub>O)<sub>5</sub>](H<sub>2</sub>O)<sub>12</sub>Cl<sub>2</sub>]<sup>0</sup> (2O)}**

|    |             |             |             |
|----|-------------|-------------|-------------|
| Al | 0.20124800  | 0.39011100  | -0.27846100 |
| O  | -0.24298600 | 2.17137300  | -0.89539200 |
| O  | -0.83715700 | -0.38528900 | -1.73159000 |
| O  | 1.72173300  | 0.29184100  | -1.25863500 |
| O  | 0.25193200  | -1.38231200 | 0.50808800  |
| O  | 1.19213900  | 1.07349400  | 1.25157600  |
| O  | -1.43379000 | 0.62568300  | 0.76638200  |
| O  | -2.81007600 | 2.56061100  | -1.54061100 |
| O  | 1.68323700  | 4.04948700  | -0.77775200 |
| O  | 0.30467900  | -2.67525000 | -2.70254400 |
| O  | -3.43099700 | -0.12652500 | -2.25615900 |
| O  | 3.52127200  | 2.13708600  | -1.29408500 |
| O  | 2.90502100  | -2.33194500 | -1.88137300 |
| O  | 4.03250000  | -1.98815800 | 0.56240400  |
| O  | -1.29176500 | -3.37235300 | -0.55974100 |
| O  | 0.97403100  | 3.65131900  | 1.90533700  |
| O  | 3.92799300  | 0.84756600  | 1.07258000  |
| O  | -3.91429700 | -2.13306100 | -0.55087300 |
| O  | -3.46364500 | 2.38594300  | 1.21851400  |
| H  | -1.15330100 | 2.41208100  | -1.21906200 |
| H  | 0.38637600  | 2.92937200  | -0.96566900 |
| H  | -0.43073200 | -1.10837000 | -2.25991500 |
| H  | -1.79748100 | -0.29315100 | -1.96407000 |
| H  | 2.83745100  | 1.39417300  | -1.40559700 |
| H  | 2.08332700  | -0.57723600 | -1.48062700 |
| H  | 0.79998000  | -1.70550800 | 1.27543700  |
| H  | -0.29156300 | -2.13782400 | 0.18114800  |
| H  | 1.03945600  | 1.99425800  | 1.59456700  |
| H  | 2.17058800  | 0.94306400  | 1.20997000  |
| H  | -1.94838100 | -0.05890200 | 1.24782900  |

|    |             |             |             |
|----|-------------|-------------|-------------|
| H  | -1.94685000 | 1.45401700  | 0.88345500  |
| H  | -3.16181100 | 1.70883100  | -1.86270600 |
| H  | 1.25237700  | -2.66770700 | -2.43366100 |
| H  | 0.27769400  | -2.98590500 | -3.62410200 |
| H  | 2.47670600  | 3.51987600  | -1.03822200 |
| H  | 4.09334500  | 2.13506000  | -2.07874900 |
| H  | 1.30526600  | 4.04368800  | 1.07451700  |
| H  | 1.69304100  | 4.86617100  | -1.30586000 |
| H  | -3.75360000 | -0.84939500 | -1.65306500 |
| H  | -3.76348000 | -0.33010600 | -3.14751500 |
| H  | 3.36311000  | -2.28773300 | -1.00323800 |
| H  | 3.60070700  | -2.39767500 | -2.55570800 |
| H  | 4.08076100  | -1.02693400 | 0.72417800  |
| H  | 3.41784100  | -2.31251500 | 1.25504800  |
| H  | -3.51680300 | 3.10728700  | 1.86946000  |
| H  | 1.52368000  | 4.01333400  | 2.62015900  |
| H  | -3.07806500 | -2.63518000 | -0.55174900 |
| H  | -3.97772100 | -1.74226000 | 0.34626500  |
| H  | -0.81657800 | -3.41062800 | -1.41584500 |
| H  | -1.23568300 | -4.26436500 | -0.17303000 |
| H  | 4.05811000  | 1.39720800  | 0.26769200  |
| H  | 4.48192100  | 1.23185800  | 1.77369600  |
| H  | -3.25115700 | 2.69510500  | -0.68196400 |
| H  | -3.89806900 | 1.60944300  | 1.62768400  |
| Cl | -3.85670400 | -0.62090400 | 2.22261200  |
| Cl | 1.84168700  | -2.72797500 | 2.70681500  |

**{[cis-Al(OH)<sub>2</sub>(H<sub>2</sub>O)<sub>3</sub>Cl]·(H<sub>2</sub>O)<sub>13</sub>}<sup>0</sup> (I)**

|    |             |             |             |
|----|-------------|-------------|-------------|
| Al | 0.09494900  | 0.14751900  | -0.04599500 |
| O  | -0.56080800 | 1.57091400  | 0.89254400  |
| O  | 1.70873000  | -0.10128800 | 0.77598800  |
| O  | 0.59612700  | -1.25829700 | -1.36901600 |
| O  | -1.52745900 | 0.25667700  | -1.24507800 |
| O  | 0.87487100  | 1.43463700  | -1.39336800 |
| O  | 0.84792000  | 3.79497600  | 1.14670500  |
| O  | -4.55771800 | 1.56857100  | 0.87846500  |
| O  | 3.15726300  | -2.37223700 | 0.64487000  |
| O  | 3.42287300  | 2.41430500  | 0.98908300  |
| O  | -4.19382700 | -1.22594400 | 0.81190600  |
| O  | 0.87861600  | -4.09166200 | 0.83319500  |
| O  | -0.91236200 | -3.56401200 | -1.57386100 |
| O  | 3.36196500  | -1.51140800 | -1.73031200 |
| O  | -2.78881700 | 2.75354900  | -0.97792000 |
| O  | -3.22491100 | -1.95294800 | -1.51684600 |
| O  | 3.66881100  | 1.19809100  | -1.55985200 |
| O  | -0.25653400 | 3.97032100  | -1.17071000 |
| H  | 0.34415000  | 2.93800900  | 1.23402100  |
| H  | -1.02195600 | 1.30225700  | 1.69139700  |
| H  | 2.65641600  | -1.55264400 | 0.88971200  |
| H  | 2.13420600  | 0.71640700  | 1.06385700  |
| H  | 0.13332800  | -2.12057700 | -1.43218700 |
| H  | 1.54846200  | -1.38818100 | -1.55915000 |
| H  | -2.07639400 | 1.04957900  | -1.08423300 |
| H  | -2.11278500 | -0.50787000 | -1.42307700 |

|    |             |             |             |
|----|-------------|-------------|-------------|
| H  | 1.84823500  | 1.47754100  | -1.47160400 |
| H  | 0.50720100  | 2.34228900  | -1.43812900 |
| H  | 1.78181600  | 3.53211900  | 1.17631700  |
| H  | 2.50739400  | -3.09624700 | 0.74133800  |
| H  | -4.39706900 | -0.27037500 | 0.86413100  |
| H  | -3.34455200 | -1.32521500 | 1.27717000  |
| H  | -3.90250600 | 2.08420400  | 0.37297500  |
| H  | -4.68627700 | 2.03409400  | 1.70997600  |
| H  | 3.74587900  | 2.02274000  | 0.15781700  |
| H  | 4.11019300  | 2.28584900  | 1.65011600  |
| H  | 0.34605600  | -4.21254400 | 0.03423100  |
| H  | 0.34986700  | -3.45073300 | 1.33526100  |
| H  | -1.79393400 | -3.15188800 | -1.44848900 |
| H  | -0.96970300 | -4.06829700 | -2.39175000 |
| H  | -1.93937400 | 3.24300900  | -0.90671200 |
| H  | -3.24961400 | 3.13044400  | -1.73473400 |
| H  | 3.67549500  | 0.21046500  | -1.61892600 |
| H  | 4.19200300  | 1.52032900  | -2.30063900 |
| H  | 3.40038100  | -1.95459300 | -0.80430500 |
| H  | 3.81650000  | -2.08735600 | -2.35254300 |
| H  | -3.69847000 | -1.74247900 | -0.65514900 |
| H  | -3.90536500 | -2.04124500 | -2.19187800 |
| H  | 0.21349400  | 4.07367200  | -0.27805000 |
| H  | -0.09038500 | 4.76816800  | -1.68178300 |
| Cl | -1.04098000 | -1.49268400 | 1.28531300  |
| H  | 0.47066500  | -0.95378400 | 3.77219000  |
| O  | 1.31248500  | -0.49889900 | 3.66996200  |
| H  | 1.41117000  | -0.43203600 | 2.70439300  |

**{[*cis*-Al(OH)<sub>2</sub>(H<sub>2</sub>O)<sub>4</sub>](H<sub>2</sub>O)<sub>12</sub>Cl]<sup>0</sup> (O)**

|    |             |             |             |
|----|-------------|-------------|-------------|
| Al | 0.38536700  | 0.18807300  | 0.34081700  |
| O  | 0.74729800  | -1.10568900 | -0.87455000 |
| O  | 1.08250100  | 1.56604100  | -0.71135100 |
| O  | -1.47917500 | 0.45501800  | -0.18870800 |
| O  | 0.00181500  | 1.50090900  | 1.74532400  |
| O  | -0.31326200 | -1.15080300 | 1.66557300  |
| O  | 2.14440900  | -0.09109300 | 1.26417500  |
| O  | 3.18937000  | -1.82063100 | -1.66404900 |
| O  | -0.97678400 | -3.64146700 | -0.93451400 |
| O  | -0.27127000 | 3.93240900  | -1.08221900 |
| O  | 4.81629700  | 0.49912500  | -1.68243200 |
| O  | -3.49576800 | -2.37045500 | -0.41364600 |
| O  | -2.86155600 | 2.63999600  | -1.23445900 |
| O  | -2.51261400 | 1.22859700  | 2.74902400  |
| O  | 0.62980600  | 4.08117300  | 1.39663200  |
| O  | 0.83990800  | -3.67548500 | 1.25268200  |
| O  | -3.02380500 | -1.39426500 | 1.94656200  |
| O  | 3.45651100  | 2.06840500  | 0.18270800  |
| O  | 3.26926400  | -2.58537600 | 0.75864500  |
| H  | 2.25436300  | -1.49960500 | -1.54792200 |
| H  | 0.06038300  | -1.71777200 | -1.16065600 |
| H  | 0.20542600  | 3.07180800  | -1.10529100 |
| H  | 1.19866400  | 1.18362200  | -1.58922200 |
| H  | -1.87717600 | 0.06516500  | -1.02562600 |

|    |             |             |             |
|----|-------------|-------------|-------------|
| H  | -1.86129100 | 1.35393900  | -0.17976900 |
| H  | -0.85266000 | 1.42716200  | 2.22786300  |
| H  | 0.23203400  | 2.46217600  | 1.65738200  |
| H  | 0.06952900  | -2.04777200 | 1.57698800  |
| H  | -1.28538600 | -1.25878900 | 1.78831500  |
| H  | 2.79156000  | 0.62554200  | 1.09205900  |
| H  | 2.60208500  | -0.95232000 | 1.15035300  |
| H  | 3.74497300  | -1.03125000 | -1.80829900 |
| H  | -1.19899600 | 3.70101000  | -1.25605100 |
| H  | -2.71060500 | -2.89352100 | -0.65560900 |
| H  | -3.58383800 | -1.70884300 | -1.13534400 |
| H  | -0.31333300 | -3.83891200 | -0.24859200 |
| H  | -0.78661500 | -4.21202400 | -1.68547900 |
| H  | 4.48547400  | 1.17639700  | -1.05988900 |
| H  | 5.16465800  | 0.97313300  | -2.44270500 |
| H  | -3.71628200 | 2.98883600  | -0.96219500 |
| H  | -3.06264600 | 1.90411500  | -1.86335000 |
| H  | -2.86231600 | 0.36019200  | 2.46006500  |
| H  | -2.83643200 | 1.37293000  | 3.64261400  |
| H  | 1.77240300  | -3.40348500 | 1.06215800  |
| H  | 0.88316000  | -4.34964300 | 1.93843100  |
| H  | 2.53575800  | 2.05327200  | -0.23069600 |
| H  | 3.56435700  | 2.92902200  | 0.60060500  |
| H  | 0.23188500  | 4.23337800  | 0.49651900  |
| H  | 0.35934000  | 4.81156800  | 1.95987600  |
| H  | -3.27586100 | -1.71338400 | 1.01790900  |
| H  | -3.43642600 | -2.01197100 | 2.55876000  |
| H  | 3.35689500  | -2.36224000 | -0.23956400 |
| H  | 4.12862600  | -2.88405300 | 1.07189500  |
| Cl | -3.11382600 | -0.13787700 | -2.58466600 |

**{[trans-Al(OH)<sub>2</sub>(H<sub>2</sub>O)<sub>3</sub>Cl]·(H<sub>2</sub>O)<sub>13</sub>}<sup>0</sup> (I)**

|    |             |             |             |
|----|-------------|-------------|-------------|
| Al | -0.12381800 | 0.06009000  | -0.18389900 |
| O  | 0.49877300  | -1.38089700 | -1.36804200 |
| O  | 0.76257400  | 1.29355900  | -1.14814000 |
| O  | -1.71857900 | 0.21139500  | -1.30924900 |
| O  | -0.69427100 | 1.51704400  | 1.03085800  |
| O  | -0.93235100 | -1.14996500 | 0.93670100  |
| O  | 3.15630600  | -1.57219600 | -1.79351400 |
| O  | -1.06031300 | -3.62650100 | -1.59026600 |
| O  | -0.27976700 | 3.67936000  | -1.67592800 |
| O  | 3.72611100  | 1.15476500  | -1.54967900 |
| O  | -3.29040700 | -1.97481600 | -1.58836500 |
| O  | -3.00961700 | 2.59280400  | -1.29555100 |
| O  | -3.40899200 | 1.72144800  | 1.29654100  |
| O  | 0.70858000  | 3.89111000  | 0.82135100  |
| O  | -0.09856600 | -3.78628200 | 0.87502100  |
| O  | -3.62583900 | -0.95751800 | 1.14525000  |
| O  | 3.30302700  | 2.60361800  | 0.78137600  |
| O  | 2.72407600  | -3.22842000 | 0.66572100  |
| H  | 1.45820400  | -1.50700800 | -1.57035200 |
| H  | 0.00719500  | -2.22047000 | -1.51607800 |
| H  | 1.69341900  | 1.18733500  | -1.37593700 |
| H  | -2.35438100 | -0.53665200 | -1.42299900 |

|    |             |             |             |
|----|-------------|-------------|-------------|
| H  | -2.19570200 | 1.06679100  | -1.42501700 |
| H  | -1.63847500 | 1.66511600  | 1.26560400  |
| H  | -0.20773500 | 2.37375100  | 1.02458400  |
| H  | -0.39122700 | -2.84563600 | 0.96503800  |
| H  | -0.73170400 | -0.99839800 | 1.87581400  |
| H  | 3.47009000  | -0.65341200 | -1.64369200 |
| H  | 3.47164900  | -1.82038200 | -2.67889700 |
| H  | -1.23666100 | 3.52618600  | -1.62160100 |
| H  | 0.12074200  | 2.76771700  | -1.60015100 |
| H  | -2.62612500 | -2.69524200 | -1.64399800 |
| H  | -3.85710400 | -2.06060200 | -2.37326700 |
| H  | -0.75073100 | -3.94344400 | -0.70038500 |
| H  | -0.89841100 | -4.33998500 | -2.23036800 |
| H  | 3.70215200  | 1.75017800  | -0.76571400 |
| H  | 4.21183600  | 1.62826700  | -2.24366700 |
| H  | -3.36862700 | 2.48598800  | -0.38943500 |
| H  | -3.76633200 | 2.77316300  | -1.87898700 |
| H  | -3.65217300 | 0.75806900  | 1.27701600  |
| H  | -3.88468400 | 2.12362900  | 2.04241000  |
| H  | 0.87503300  | -3.72793100 | 0.80805100  |
| H  | 2.48772300  | 3.13742400  | 0.72577600  |
| H  | 2.98833800  | 1.76924400  | 1.17853200  |
| H  | 0.34741100  | 4.06223800  | -0.08382100 |
| H  | 0.50929000  | 4.67235000  | 1.36317700  |
| H  | -3.96011800 | -1.34327100 | 0.32171300  |
| H  | -2.64299000 | -1.09637800 | 1.08128600  |
| H  | 3.00764700  | -3.00167200 | -0.23415300 |
| H  | 2.60139900  | -2.34618100 | 1.06498200  |
| Cl | 2.02503400  | -0.21212600 | 1.39290000  |
| O  | -0.07194800 | -0.71174900 | 3.71755300  |
| H  | 0.12934600  | -1.49165200 | 4.25836100  |
| H  | 0.75538300  | -0.50821300 | 3.24445900  |

**{[trans-Al(OH)<sub>2</sub>(H<sub>2</sub>O)<sub>4</sub>](H<sub>2</sub>O)<sub>12</sub>Cl]<sup>0</sup> (O)}**

|    |             |             |             |
|----|-------------|-------------|-------------|
| Al | -0.41576400 | -0.18706500 | -0.38477600 |
| O  | -1.69875500 | -0.93965200 | 0.97169200  |
| O  | 0.30074800  | 0.87421000  | 0.94889100  |
| O  | 0.84000800  | -1.61191200 | -0.07385200 |
| O  | 0.82692500  | 0.54658500  | -1.77580600 |
| O  | -1.29986000 | -1.19381800 | -1.62332300 |
| O  | -1.65305200 | 1.31085200  | -0.82541700 |
| O  | -3.43030000 | 0.95061100  | 2.08944900  |
| O  | -2.90189700 | -3.37484500 | 0.40570300  |
| O  | 2.21470000  | 2.88585300  | 0.59199400  |
| O  | -1.39018800 | 2.54903800  | 2.19216300  |
| O  | -0.20090900 | -4.12226700 | -0.00552100 |
| O  | 4.37016200  | 1.21451100  | 0.49249100  |
| O  | 3.44267500  | -0.30181100 | -1.91480200 |
| O  | 1.14046100  | 3.36370500  | -1.64944700 |
| O  | -3.81119800 | -1.96262000 | -1.57994900 |
| O  | 4.23171900  | -2.46054900 | -0.53760600 |
| O  | -1.19905200 | 3.98064800  | -0.42254400 |
| O  | -4.39326500 | 0.78273200  | -0.49015100 |
| H  | -2.29107000 | -0.35797400 | 1.48893100  |

|    |             |             |             |
|----|-------------|-------------|-------------|
| H  | -2.13867400 | -1.80761600 | 0.84733100  |
| H  | 0.84229900  | 0.37191900  | 1.57470900  |
| H  | 1.52889900  | -1.54676400 | 0.65146000  |
| H  | 0.50056800  | -2.53886700 | -0.10976600 |
| H  | 1.74314000  | 0.18036000  | -1.80670300 |
| H  | 0.90340200  | 1.52051900  | -1.85654300 |
| H  | -2.87016300 | -1.65376900 | -1.72964900 |
| H  | -0.87539500 | -1.21412900 | -2.48378700 |
| H  | -1.57470400 | 2.26278600  | -0.59832000 |
| H  | -2.59303800 | 1.10014200  | -0.97854700 |
| H  | -2.71566000 | 1.66066800  | 2.17201300  |
| H  | -3.84371400 | 0.86706900  | 2.95453300  |
| H  | 3.07583200  | 2.40452500  | 0.60609700  |
| H  | 1.55334900  | 2.19765200  | 0.82695600  |
| H  | -1.16884000 | -4.00154700 | 0.05647300  |
| H  | 0.05141300  | -4.62870800 | 0.77321700  |
| H  | -3.39007800 | -2.96315500 | -0.37260900 |
| H  | -3.53847400 | -3.88509700 | 0.91508600  |
| H  | -1.34224600 | 3.33323200  | 1.62812600  |
| H  | -0.69535400 | 1.93808300  | 1.82142200  |
| H  | 4.23753700  | 0.78121000  | -0.36511000 |
| H  | 4.12907400  | 0.52374800  | 1.13812400  |
| H  | 3.68757400  | -1.16620200 | -1.49053300 |
| H  | 3.90882500  | -0.27603100 | -2.75638000 |
| H  | -4.27087100 | -1.16285600 | -1.28671300 |
| H  | -0.34473400 | 3.96020100  | -0.91705700 |
| H  | -1.72080200 | 4.69683400  | -0.79691800 |
| H  | 1.70074900  | 3.26187300  | -0.79573900 |
| H  | 1.64985100  | 3.88211300  | -2.27989300 |
| H  | 3.91208800  | -3.35908200 | -0.66411100 |
| H  | 3.95357100  | -2.20518900 | 0.37366800  |
| H  | -4.25817600 | 0.88161500  | 0.47753300  |
| H  | -5.14267400 | 1.33769500  | -0.72728900 |
| Cl | 2.92294400  | -1.28785800 | 2.02119700  |

**{[cis-Al(OH)<sub>3</sub>(H<sub>2</sub>O)Cl]·(H<sub>2</sub>O)<sub>14</sub>}<sup>+</sup> (I)**

|    |             |             |             |
|----|-------------|-------------|-------------|
| Al | -0.72627900 | -0.46080000 | -0.56670800 |
| O  | -0.55630800 | -2.19889600 | 0.03774200  |
| O  | 0.74175200  | 0.04107200  | -1.42395700 |
| O  | -2.17892100 | -0.55821500 | -1.57024300 |
| O  | -1.03845900 | 0.62097500  | 0.78497800  |
| O  | 4.37424000  | -0.38532900 | -0.26011600 |
| O  | 2.56059300  | -4.29606000 | -1.27083800 |
| O  | -0.27931900 | 2.66261100  | -2.38708200 |
| O  | 2.95608400  | 1.67064900  | -0.79982000 |
| O  | -4.40759700 | -2.06138800 | -1.03301800 |
| O  | -3.06510200 | 2.24494300  | -1.68213100 |
| O  | -3.24242600 | 1.77362800  | 1.01882200  |
| O  | 0.59997300  | 4.74673900  | -0.78786900 |
| O  | 1.47030200  | -3.20832000 | 1.13909500  |
| O  | -4.63250000 | -0.57254000 | 1.52337000  |
| O  | 2.34284600  | 3.47267800  | 1.10727600  |
| O  | 2.96311700  | -1.23793500 | 2.16713600  |
| H  | 5.31342800  | -0.19792700 | -0.17715300 |



|                                                                                                                     |             |             |             |
|---------------------------------------------------------------------------------------------------------------------|-------------|-------------|-------------|
| H                                                                                                                   | -1.38422700 | -2.57645300 | 0.45984400  |
| H                                                                                                                   | 0.13463600  | 1.79950100  | -2.20464100 |
| H                                                                                                                   | 1.29321300  | -0.60164300 | -1.88828700 |
| H                                                                                                                   | -2.53716600 | 0.28468000  | -1.87803800 |
| H                                                                                                                   | -2.30192600 | 1.31947400  | 0.98394000  |
| H                                                                                                                   | -0.35777900 | 0.81067700  | 1.47169000  |
| H                                                                                                                   | 3.89773000  | 0.50283300  | -0.41418900 |
| H                                                                                                                   | -1.22694000 | 2.54384100  | -2.20349400 |
| H                                                                                                                   | 1.74750300  | -4.59359500 | -1.69065600 |
| H                                                                                                                   | -3.62218200 | -1.55285000 | -1.34948400 |
| H                                                                                                                   | 2.00308400  | -3.65006300 | 0.45300900  |
| H                                                                                                                   | 2.77713200  | -3.44615900 | -1.70530800 |
| H                                                                                                                   | 2.78995700  | 2.34347400  | -0.08839200 |
| H                                                                                                                   | 2.09965500  | 1.21580000  | -0.94053600 |
| H                                                                                                                   | -3.22274500 | 2.20249800  | -0.70902200 |
| H                                                                                                                   | -3.82426500 | 2.68828400  | -2.06974600 |
| H                                                                                                                   | -4.18010300 | 0.29500100  | 1.40832500  |
| H                                                                                                                   | -3.15704900 | 2.48964000  | 1.65666300  |
| H                                                                                                                   | 2.04251500  | -2.51773900 | 1.57269900  |
| H                                                                                                                   | 0.28224600  | -2.59061400 | 0.50472200  |
| H                                                                                                                   | 1.61523600  | 3.94893400  | 0.66834400  |
| H                                                                                                                   | 1.93500800  | 2.89776200  | 1.79068200  |
| H                                                                                                                   | 0.29012700  | 3.99375300  | -1.34132700 |
| H                                                                                                                   | 1.25900100  | 5.18772800  | -1.33188000 |
| H                                                                                                                   | -4.79419800 | -1.48072100 | -0.36048700 |
| H                                                                                                                   | -5.28788900 | -0.43560600 | 2.21288500  |
| H                                                                                                                   | 3.48793500  | -0.87630200 | 1.43425100  |
| H                                                                                                                   | 2.41500100  | -0.48845000 | 2.49414600  |
| O                                                                                                                   | -2.86781800 | -3.00501200 | 1.03930400  |
| H                                                                                                                   | -3.20467400 | -2.29389800 | 1.60526000  |
| H                                                                                                                   | -3.45139700 | -2.92656300 | 0.24948300  |
| H                                                                                                                   | 3.64247100  | -1.29133300 | -1.54150100 |
| O                                                                                                                   | 3.09662000  | -1.73557900 | -2.23793700 |
| H                                                                                                                   | 3.50564300  | -1.50545600 | -3.07741500 |
| Cl                                                                                                                  | 1.10388300  | 1.21763100  | 2.96794800  |
| <b>{[<i>cis</i>-Al(OH)<sub>3</sub>(H<sub>2</sub>O)<sub>2</sub>](H<sub>2</sub>O)<sub>13</sub>Cl }<sup>+</sup>(O)</b> |             |             |             |
| Al                                                                                                                  | 0.40230300  | 0.31484000  | 0.11573500  |
| O                                                                                                                   | 2.04958900  | 1.03101400  | 0.47382900  |
| O                                                                                                                   | -0.51555300 | 0.64443900  | -1.40135300 |
| O                                                                                                                   | 1.52899500  | -1.09558800 | -0.80736900 |
| O                                                                                                                   | -0.31844900 | -1.16451400 | 1.00570600  |
| O                                                                                                                   | -1.77107200 | 3.47635600  | 0.20719400  |
| O                                                                                                                   | 2.30164200  | 3.58933600  | -0.85763000 |
| O                                                                                                                   | -1.51350500 | -1.67566900 | -2.75604600 |
| O                                                                                                                   | -3.27099400 | 1.36891700  | -1.04723700 |
| O                                                                                                                   | 4.03052200  | -0.29409100 | -1.83097700 |
| O                                                                                                                   | 0.47090900  | -3.23908100 | -1.90557200 |
| O                                                                                                                   | 0.76068300  | -3.65981600 | 1.05364200  |
| O                                                                                                                   | -3.87917300 | -2.48688200 | -1.49142700 |
| O                                                                                                                   | 1.48494300  | 3.38466700  | 2.06696700  |
| O                                                                                                                   | 3.46125600  | -3.21489800 | 1.03072000  |
| O                                                                                                                   | -4.37645300 | -0.70655900 | 0.46456500  |
| O                                                                                                                   | -0.46598000 | 1.50720400  | 1.26173700  |

|    |             |             |             |
|----|-------------|-------------|-------------|
| H  | -1.86365100 | 4.16466700  | 0.87215200  |
| H  | 1.99853400  | 1.69775500  | 1.17986000  |
| H  | -1.22062400 | -0.82253800 | -2.37561700 |
| H  | -0.35443800 | 1.48606500  | -1.84793700 |
| H  | 2.32510200  | -0.79979200 | -1.29256200 |
| H  | 0.05459000  | -2.07566100 | 1.02176500  |
| H  | -1.03056300 | -1.05159900 | 1.72892000  |
| H  | -3.09955900 | 2.19581300  | -0.57111700 |
| H  | -0.34022400 | -2.79832600 | -2.27806400 |
| H  | 2.31056300  | 2.64581300  | -0.61714600 |
| H  | 3.99341200  | 0.63273700  | -2.09029800 |
| H  | 1.66182400  | 3.79071100  | 1.20360700  |
| H  | 1.51107400  | 3.69261500  | -1.41281000 |
| H  | -4.05484700 | 0.10139800  | 0.01208100  |
| H  | -2.36849800 | 1.01850100  | -1.19776900 |
| H  | 0.19440700  | -3.71529800 | -1.11170300 |
| H  | 1.15140100  | -1.89184100 | -1.28170700 |
| H  | 1.73983300  | -3.53355900 | 1.09674700  |
| H  | 0.51138300  | -4.16861600 | 1.83134200  |
| H  | 0.67234000  | 2.85311600  | 1.94025200  |
| H  | -4.05495000 | -1.90683300 | -0.70421100 |
| H  | -3.87652200 | -0.74240800 | 1.30251100  |
| H  | -2.37117800 | -1.89450600 | -2.33545500 |
| H  | -4.68505700 | -2.43861300 | -2.01311300 |
| H  | 3.76767400  | -3.47961700 | 0.15711300  |
| H  | 3.64629100  | -2.25002300 | 1.07222100  |
| H  | -1.28332700 | 2.70199100  | 0.65876900  |
| H  | -1.04678500 | 1.10129200  | 1.92848000  |
| O  | 4.08402500  | -0.49293900 | 0.94691300  |
| H  | 4.34397900  | -0.28787900 | -0.90634300 |
| H  | 4.61617600  | -0.09799400 | 1.64399600  |
| H  | -0.89252600 | 3.67991700  | -1.28253200 |
| O  | -0.30605500 | 3.57513900  | -2.06994200 |
| H  | -0.80680500 | 3.88286500  | -2.83032700 |
| Cl | -2.33453500 | -0.60370400 | 3.02425700  |
| H  | 3.26547800  | 0.10361800  | 0.83223000  |

**{{*trans*-Al(OH)<sub>3</sub>(H<sub>2</sub>O)Cl}·(H<sub>2</sub>O)<sub>14</sub>}<sup>+</sup> (I)**

|    |             |             |             |
|----|-------------|-------------|-------------|
| Al | 0.05377100  | -0.05458900 | -0.09760800 |
| O  | -2.49895500 | 1.17109800  | -2.61239800 |
| O  | 1.43304700  | -0.34198500 | 1.02119500  |
| O  | 1.31883000  | 0.86717800  | -1.39471400 |
| O  | -0.25518100 | -1.34945100 | -1.26617600 |
| O  | -0.96398300 | 1.42213600  | -0.24941300 |
| O  | -4.42088800 | 0.61220700  | 0.95147100  |
| O  | -0.98203400 | -4.04663900 | 0.80131400  |
| O  | 3.94916600  | 3.19942200  | 0.91793200  |
| O  | -3.05299100 | 3.28750900  | 1.25535900  |
| O  | 1.73254400  | -3.24757700 | 0.65800300  |
| O  | 3.96237400  | 0.55397400  | 0.75171200  |
| O  | 3.65827700  | -0.56406500 | -1.92431300 |
| O  | 1.99550800  | 3.56005100  | -0.89611700 |
| O  | -2.36083100 | -3.10909700 | -1.46047400 |
| O  | 3.44005200  | -3.15849400 | -1.34953900 |

|    |             |             |             |
|----|-------------|-------------|-------------|
| O  | -0.95097500 | 4.08844100  | -0.42097300 |
| O  | -4.33583500 | -0.88012300 | -1.60234700 |
| H  | -2.87474500 | 2.04976000  | -2.72062100 |
| H  | -1.91892000 | 1.24727500  | -1.82474800 |
| H  | 1.24969600  | -0.45754600 | 1.96691200  |
| H  | 2.15133300  | 0.39048000  | -1.59927700 |
| H  | 1.52761800  | 1.81297200  | -1.23812300 |
| H  | -1.61919500 | -2.46606200 | -1.43500700 |
| H  | -0.05672200 | -1.12859200 | -2.17887300 |
| H  | -0.04026000 | 4.40488900  | -0.38300400 |
| H  | -1.67120400 | 1.45020800  | 0.40526000  |
| H  | -4.10310100 | 1.52871400  | 0.94764800  |
| H  | -3.67710800 | 0.09956200  | 1.30701200  |
| H  | 4.00721500  | 2.20174900  | 0.89702700  |
| H  | 3.80010400  | 3.43240500  | 1.83883100  |
| H  | 0.81481900  | -3.59683000 | 0.59336200  |
| H  | 1.63320800  | -2.28423000 | 0.77838000  |
| H  | -1.52339500 | -3.94135500 | -0.01074400 |
| H  | -1.25020400 | -3.26611200 | 1.30909100  |
| H  | -2.36809000 | 3.76478100  | 0.74329100  |
| H  | -2.79214400 | 3.37670700  | 2.17661000  |
| H  | 4.18389400  | 0.22216400  | -0.13086300 |
| H  | 3.03517900  | 0.22357700  | 0.90198300  |
| H  | 3.58319100  | -1.53928300 | -1.71971400 |
| H  | 4.00999900  | -0.50921600 | -2.81762200 |
| H  | -3.15107700 | -2.54123600 | -1.43182000 |
| H  | -0.83649800 | 3.10757100  | -0.47133800 |
| H  | 2.70180500  | 3.51191200  | -0.20147900 |
| H  | 2.38693100  | 4.03225900  | -1.63722100 |
| H  | 2.71741800  | -3.26990800 | -0.66316500 |
| H  | 4.21163600  | -3.57584400 | -0.95531400 |
| H  | -4.51564000 | -0.41729700 | -0.76593400 |
| H  | -3.75013800 | -0.26328100 | -2.07474800 |
| Cl | -1.54044600 | -0.87674000 | 1.64375000  |
| O  | 0.69581400  | -0.75557900 | 3.84998400  |
| H  | -0.18276400 | -0.78153900 | 3.42577700  |
| H  | 0.89421100  | -1.67646900 | 4.04953400  |

**{[trans-Al(OH)<sub>3</sub>(H<sub>2</sub>O)<sub>2</sub>](H<sub>2</sub>O)<sub>13</sub>Cl} (O)**

|    |             |             |             |
|----|-------------|-------------|-------------|
| Al | 0.40761000  | 0.35070100  | -0.00281500 |
| O  | 1.62104100  | 1.65090900  | 0.25790400  |
| O  | -0.82928500 | 0.34301300  | -1.32300400 |
| O  | 1.75730800  | -0.47702200 | -1.25718600 |
| O  | 0.37012500  | -1.12366700 | 0.99368800  |
| O  | -3.01455300 | 2.61842900  | -0.10231400 |
| O  | 0.98992000  | 4.11396700  | -1.10199100 |
| O  | -1.17867100 | -2.26466200 | -2.36254300 |
| O  | -3.63286300 | 0.30621900  | -0.98794700 |
| O  | 4.47439900  | -0.10951900 | -1.36728200 |
| O  | 1.48315600  | -3.22635400 | -1.61690000 |
| O  | 1.90871200  | -3.11842900 | 1.01391700  |
| O  | -3.24467500 | -3.57474800 | -1.10473100 |
| O  | 0.54658700  | 4.02216600  | 1.74897100  |
| O  | 4.44737400  | -1.85687300 | 1.25242000  |

|    |             |             |             |
|----|-------------|-------------|-------------|
| O  | -4.17626500 | -1.65866200 | 0.78936300  |
| O  | -0.89945400 | 1.32032000  | 1.25650000  |
| H  | -3.65962300 | 3.09784200  | 0.42525200  |
| H  | 1.38566200  | 2.29029600  | 0.94761600  |
| H  | -1.06032100 | -1.33727600 | -2.06205800 |
| H  | -0.79370600 | 1.06037300  | -1.96736100 |
| H  | 2.71200300  | -0.24810600 | -1.31531300 |
| H  | 1.66830800  | -1.41686100 | -1.51055200 |
| H  | 1.27397100  | -2.29904400 | 1.06899200  |
| H  | -0.32862900 | -1.18488700 | 1.67349100  |
| H  | -3.43159300 | 1.73794700  | -0.39605900 |
| H  | -0.33706900 | -2.70158300 | -2.16033100 |
| H  | 1.38418900  | 3.24543200  | -0.90080000 |
| H  | 4.89348600  | 0.40737700  | -2.06093400 |
| H  | 0.56386900  | 4.27899200  | 0.80826900  |
| H  | 0.19963800  | 3.90660900  | -1.62774500 |
| H  | -3.90574100 | -0.38636100 | -0.33154400 |
| H  | -2.68062900 | 0.14018100  | -1.15236300 |
| H  | 1.64453600  | -3.39385500 | -0.65191800 |
| H  | 2.09741900  | -3.77610400 | -2.11106500 |
| H  | 3.59670500  | -2.33772100 | 1.25292200  |
| H  | 1.59508500  | -3.74501200 | 1.67344100  |
| H  | -0.17238900 | 3.38267200  | 1.82997200  |
| H  | -3.81726100 | -2.43249800 | 0.31577400  |
| H  | -3.58286700 | -1.49746100 | 1.55109200  |
| H  | -2.49425100 | -3.10943500 | -1.54430900 |
| H  | -3.94012500 | -3.59258800 | -1.76851100 |
| H  | 4.67638900  | -1.76386900 | 0.31954500  |
| H  | 4.18869200  | 0.17769300  | 1.44377700  |
| H  | -1.65343300 | 1.75409600  | 0.80437300  |
| H  | -1.30506200 | 0.71069400  | 1.94800500  |
| O  | 4.20834800  | 1.02283300  | 0.96273800  |
| H  | 4.52674000  | 0.43296100  | -0.52411500 |
| H  | 3.26590800  | 1.28031500  | 0.81741500  |
| H  | -2.08338400 | 3.11817600  | -1.55171800 |
| O  | -1.44991400 | 3.18803700  | -2.29887100 |
| H  | -1.96473100 | 3.45304000  | -3.06589000 |
| Cl | -2.04770900 | -0.77757800 | 3.04925800  |

**{[ Al(OH)<sub>4</sub> ]·(H<sub>2</sub>O)<sub>14</sub>Cl }<sup>2-</sup> (I)**

|    |             |             |             |
|----|-------------|-------------|-------------|
| Al | -1.57321600 | 1.10947800  | 0.10010700  |
| O  | -0.13832800 | 0.09295800  | -0.30326800 |
| O  | -1.11546000 | 2.54008200  | 1.05804600  |
| O  | -2.21940900 | 1.60319500  | -1.48795900 |
| O  | -2.79288300 | 0.19138200  | 1.01812600  |
| O  | 1.74585300  | -1.26159900 | 1.40139500  |
| O  | -0.40061000 | -1.96369500 | -2.05096400 |
| O  | 2.48836000  | 1.14084200  | 2.48716500  |
| O  | -0.25244500 | -2.82924600 | 2.34123400  |
| O  | 1.74152700  | 1.10859600  | -1.95173100 |
| O  | 2.80818300  | 2.69545400  | 0.16958300  |
| O  | -1.55807500 | -3.65246700 | -0.08017200 |
| O  | 2.29947900  | -1.50619900 | -2.84361000 |
| O  | 0.52642900  | 4.28334700  | -0.23560700 |

|    |             |             |             |
|----|-------------|-------------|-------------|
| O  | -0.05639200 | 1.58377400  | 3.62354600  |
| O  | -2.91134000 | -0.74836100 | -2.73526100 |
| O  | 0.01510800  | 3.06802100  | -2.79596400 |
| O  | -1.68296500 | -0.58562600 | 3.36439600  |
| O  | -3.85575700 | -2.04467500 | -0.52368900 |
| H  | 0.41370800  | -0.33292900 | 0.37667200  |
| H  | -0.76226200 | 2.36861700  | 1.94517600  |
| H  | -1.61297000 | 2.12838000  | -2.03312100 |
| H  | -3.21897100 | -0.56515300 | 0.58515000  |
| H  | 2.12703400  | -0.45773200 | 1.82810700  |
| H  | 2.44879000  | -1.66009800 | 0.84271600  |
| H  | -0.31694700 | -1.20524000 | -1.41701800 |
| H  | -0.69765700 | -2.69675800 | -1.47328000 |
| H  | 2.58150600  | 1.72894100  | 1.70507500  |
| H  | 1.64118400  | 1.38034200  | 2.91264300  |
| H  | 1.05095900  | 0.75970200  | -1.32874100 |
| H  | 2.07766600  | 0.29619700  | -2.38623400 |
| H  | -1.14402300 | -3.40149800 | 0.76831100  |
| H  | -2.40914300 | -3.17519500 | -0.11621000 |
| H  | 0.55232200  | -2.33062700 | 2.05973800  |
| H  | 0.05978000  | -3.53817000 | 2.92921900  |
| H  | 2.64709300  | 2.08610600  | -0.57674100 |
| H  | 2.07415700  | 3.34311000  | 0.08430300  |
| H  | 1.39522800  | -1.81670300 | -2.63781500 |
| H  | 2.85426300  | -1.86287900 | -2.11912800 |
| H  | -0.10095400 | 3.69983800  | 0.26170000  |
| H  | 0.34893100  | 4.07501300  | -1.17039000 |
| H  | -2.70602700 | 0.14998300  | -2.37442900 |
| H  | -2.05051600 | -1.21033900 | -2.72028500 |
| H  | -2.16521400 | -0.32789600 | 2.53644700  |
| H  | -1.21503800 | -1.40812400 | 3.12412800  |
| H  | -0.61380900 | 0.76492400  | 3.63264000  |
| H  | -0.18143600 | 2.01301900  | 4.48606000  |
| H  | 0.05350500  | 3.40650200  | -3.70573300 |
| H  | 0.70584100  | 2.37124000  | -2.72458200 |
| H  | -3.66861800 | -1.61243000 | -1.39290300 |
| H  | -4.78005600 | -2.34284400 | -0.54893300 |
| C1 | 3.99607600  | -2.63392900 | -0.37035600 |
